# Supplementary material for: Small reduction in land surface albedo due to solar panel expansion worldwide
Source: Springer Nature journal article supplement (doi:10.1038/s43247-024-01619-w), 2024-08-30
Supplement: 43247_2024_1619_MOESM1_ESM.pdf [file 43247_2024_1619_MOESM1_ESM.pdf]

## Small reduction in land surface albedo due to solar panel expansion worldwide

Corresponding Author: Professor Zhenzhong Zeng

Version 0:

Decision Letter:

**\*\* Please ensure you delete the link to your author home page in this e-mail if you wish to forward it to your coauthors \*\***

Dear Professor Zeng,

Your manuscript titled "Observation-based assessment of photovoltaics-laying effect on land surface albedo" has now been seen by 2 reviewers, and we include their comments at the end of this message. They find your work of interest, but some important points are raised. We are interested in the possibility of publishing your study in Communications Earth & Environment but would like to consider your responses to these concerns and assess a revised manuscript before we make a final decision on publication.

We therefore invite you to revise and resubmit your manuscript, along with a point-by-point response that takes into account the points raised. Please highlight all changes in the manuscript text file.

We are committed to providing a fair and constructive peer-review process. Please don't hesitate to contact us if you wish to discuss the revision in more detail.

Please use the following link to submit your revised manuscript, point-by-point response to the referees' comments (which should be in a separate document to any cover letter), a tracked-changes version of the manuscript (as a PDF file) and the completed checklist:

Link Redacted

**\*\* This url links to your confidential home page and associated information about manuscripts you may have submitted or be reviewing for us. If you wish to forward this email to co-authors, please delete the link to your homepage first \*\***

We hope to receive your revised paper within six weeks; please let us know if you aren't able to submit it within this time so that we can discuss how best to proceed. If we don't hear from you, and the revision process takes significantly longer, we may close your file. In this event, we will still be happy to reconsider your paper at a later date, as long as nothing similar has been accepted for publication at Communications Earth & Environment or published elsewhere in the meantime.

Please do not hesitate to contact us if you have any questions or would like to discuss these revisions further. We look forward to seeing the revised manuscript and thank you for the opportunity to review your work.

Best regards,

Sylvia Sullivan, PhD  
Editorial Board Member  
Communications Earth & Environment

Martina Grecequet, PhD  
Associate Editor  
Communications Earth & Environment  
@CommsEarth

### EDITORIAL POLICIES AND FORMATTING

We ask that you ensure your manuscript complies with our editorial policies. Please ensure that the following formatting requirements are met, and any checklist relevant to your research is completed and uploaded as a Related Manuscript file

type with the revised article.

Editorial Policy: [Policy requirements](https://www.nature.com/documents/nr-editorial-policy-checklist.pdf) (Download the link to your computer as a PDF.)

Furthermore, please align your manuscript with our format requirements, which are summarized on the following checklist: [Communications Earth & Environment formatting checklist](https://www.nature.com/documents/commsj-phys-style-formatting-checklist-article.pdf)

and also in our style and formatting guide [Communications Earth & Environment formatting guide](https://www.nature.com/documents/commsj-phys-style-formatting-guide-accept.pdf).

**\*\*\* DATA:** Communications Earth & Environment endorses the principles of the Enabling FAIR data project (<http://www.copdess.org/enabling-fair-data-project/>). We ask authors to make the data that support their conclusions available in permanent, publically accessible data repositories. (Please contact the editor if you are unable to make your data available).

All Communications Earth & Environment manuscripts must include a section titled "Data Availability" at the end of the Methods section or main text (if no Methods). More information on this policy, is available at <http://www.nature.com/authors/policies/data/data-availability-statements-data-citations.pdf>.

In particular, the Data availability statement should include:

- Unique identifiers (such as DOIs and hyperlinks for datasets in public repositories)
- Accession codes where appropriate
- If applicable, a statement regarding data available with restrictions
- If a dataset has a Digital Object Identifier (DOI) as its unique identifier, we strongly encourage including this in the Reference list and citing the dataset in the Data Availability Statement.

**DATA SOURCES:** All new data associated with the paper should be placed in a persistent repository where they can be freely and enduringly accessed. We recommend submitting the data to discipline-specific, community-recognized repositories, where possible and a list of recommended repositories is provided at <http://www.nature.com/sdata/policies/repositories>.

If a community resource is unavailable, data can be submitted to generalist repositories such as [figshare](https://figshare.com/) or [Dryad Digital Repository](http://datadryad.org/). Please provide a unique identifier for the data (for example a DOI or a permanent URL) in the data availability statement, if possible. If the repository does not provide identifiers, we encourage authors to supply the search terms that will return the data. For data that have been obtained from publically available sources, please provide a URL and the specific data product name in the data availability statement. Data with a DOI should be further cited in the methods reference section.

Please refer to our data policies at <http://www.nature.com/authors/policies/availability.html>.

## REVIEWER COMMENTS:

Reviewer #1 (Remarks to the Author):

The manuscript by Wei et al "Observation-based assessment of photovoltaics-laying effect on land surface albedo" used MODIS albedo product and a global inventory of PV sites to quantify the impact of PV on albedo and RF. The environmental impact of PV has attracted growing attention nowadays, and the topic of the study is worth investigating. Overall, the manuscript is well-written, and the results are clear.

Major comments:

1. The argument that climate models overestimate the albedo effect of PV is not supported by the analysis. Although the average albedo of PV is 0.16 by satellite data in this study, which is larger than 0.1 assumed in climate models, it is not necessarily that climate models overestimate the albedo difference without knowing the background albedo in climate models. If the background albedo in climate is also higher than that from satellite data, the albedo change could still be similar to that in satellite data. Also, the albedo difference is related to how PV is parametrized in climate models. Some PV parametrizations include variable albedo of PV (e.g., Heusinger 2019; Chang 2022).
2. Comparison with other studies on the albedo impact of PV can be made, e.g., with recent literature (Jiang 2022; Xu 2024). The largest albedo difference of PV observed in open shrubland is different from other studies. I wonder the reason. Additionally, some earlier papers explored the radiative forcing of the albedo of PV, which is worth mentioning (Nemet 2009).

Specific comments

L105 -109: PV albedo varies in different bands at different times (hours, seasons) and is affected by many factors (Ying 2022). As for PV parameterization in climate models, there are constant (0.1) or variable in complicated schemes (Heusinger

2019; Chang 2022).

L115-117. This can be compared with the albedo effect estimated by Xu 2024, who quantified the albedo effect of PV using many sites.

Fig 2. Please add a zero tick on panel c and d.

L136-137. The largest albedo decrease in open shrubland is unexpected. As seen from table S3, albedo change is largest over barren land.

L202-208. This argument is not convincing. If a constant albedo of 0.1 is applied in climate models, it is unclear how much albedo changes are in models relative to its background albedo. The analysis only shows albedo change from satellite data.

L368-375: What would the results be if PV grid fractions were not considered? What if directly comparing the albedo differences?

#### References:

- Chang, R., Yan, Y., Luo, Y., Xiao, C., Wu, C., Jiang, J., & Shi, W. (2022). A coupled WRF-PV mesoscale model simulating the near-surface climate of utility-scale photovoltaic plants. *Solar Energy*, 245, 278–289. <https://doi.org/10.1016/j.solener.2022.09.023>
- Heusinger, J., Broadbent, A. M., Sailor, D. J., & Georgescu, M. (2020). Introduction, evaluation and application of an energy balance model for photovoltaic modules. *Solar Energy*, 195(September 2019), 382–395. <https://doi.org/10.1016/j.solener.2019.11.041>
- Li, S., Weigand, J., & Ganguly, S. (2017). The Potential for Climate Impacts from Widespread Deployment of Utility-Scale Solar Energy Installations: An Environmental Remote Sensing Perspective. *Journal of Remote Sensing & GIS*, 6(1), 1–5. <https://doi.org/10.4172/2469-4134.1000190>
- Nemet, G. F. (2009). Net radiative forcing from widespread deployment of photovoltaics. *Environmental Science and Technology*, 43(6), 2173–2178. <https://doi.org/10.1021/es801747c>
- Xu, Z., Li, Y., Qin, Y., & Bach, E. (2024). A global assessment of the effects of solar farms on albedo, vegetation, and land surface temperature using remote sensing. *Solar Energy*, 268, 112198. <https://doi.org/10.1016/j.solener.2023.112198>
- Ying, J., Li, Z., Yang, L., Jiang, Y., Luo, Y., & Gao, X. (2022). The characteristics and parameterizations of the surface albedo of a utility-scale photovoltaic plant in the Gobi Desert. *Theoretical and Applied Climatology*. <https://doi.org/10.1007/s00704-022-04337-5>

Reviewer #2 (Remarks to the Author):

Review - 1:

Observation-based assessment of photovoltaics-laying effect on land surface albedo

Authors: Sihuan Wei et al., 2024

Considering the need to increase the electrical supply to the humanity growing demand sharply, and at the same time to reduce fossil fuel emitted greenhouse gasses to the atmosphere, currently a major source of CO<sub>2</sub> emission, the importance of green alternative energy becomes a necessary solution. Large-scale photovoltaic (PV) field installations in sunny regions could become primary electricity production sources. However, it is now well recognized that large scale, land cover changes, could have direct effects on the land-atmosphere energy exchanges that affect the Earth's radiative forcing and the climate system. The driven effects by the land cover changes could contradict the CO<sub>2</sub>-suppressing cooling impact on the climate.

In his paper Sihuan Wei et al., assess the radiative forcing balance, result from existing PV installation fields by comparing the eliminating CO<sub>2</sub> emission due to the green electrical manufacturing vs. the albedo change effect of the installed dark PV sheets over that surface. For their analyzing assessments, the authors used the electrical output of the study sites to calculate the alternative CO<sub>2</sub>-prevented emission against the change in the surface albedo calculated by remote sensing techniques. The strength of this study is in the large areas it has performed: area-wise, of about 20% of the identified PV sites in their survey, and the use of remote sensing to identify the sites' areas, and to calculate the albedo change by the PV cover over the PV site.

It is an interesting paper and clear, but it suffers from several major drawbacks:

1. In the calculation of the Carbon suppression, the difference between the carbon uptake by the surface before the PV installation to the carbon 'uptake' by the PV field should be considered. This is presumably, for most sites, will extend the breakeven duration.
2. For future assessment of the climatic impact of a site at a given location for possible PV installations and for comparing the RF among sites and other uses, the relative forcing effect per unit of area is needed. Please reconsider the conclusions drawn in Line (L) 186.
3. Unclear are the significant Albedo differences among countries (e.g., Figure 3)? Is it because of the PV's types, the installation procedure, by the different ecosystem types, or? Otherwise, why will it be a country-dependent variable?
4. Throughout the calculations, the time scale of the albedo change for the radiative forcing-driven values is unclear

(Methods part). For example, are  $R\downarrow_{SR}$  and the  $\Delta$ Albedo averages in equation 6 annually average? Have those values weighted by seasonal and daily RSR changes?

5. The term  $\mu Wm^{-2}$  needs explanation. It is likely the projected global average (all Earth's surface, annually, and for which year?) RF penalty of PV installation? Then, consider presenting this against the benefit of CO<sub>2</sub> suppression by the PV's.

6. The PV field albedo value depends on the spacing area between PV rows and the PV sheets' angles, which affect the electricity production efficiency per unit area at a given site. Since it is a global-scale study that may served decision-makers, prior to PV installation decisions in future work, it is recommended that the authors elaborate more on electrical output per a unit area of PV field.

7. This study concentrated on the albedo change radiative forcing; however, PV also has other RF impacts, as well as environmental and ecological aspects that must consider as well (e.g., <https://doi.org/10.1093/pnasnexus/pgad352>) before converting an area to a PV site.

Minor comments:

L. 188. Unclear are the 'relatively concentrated variations' and the connection to Fig. 2.c.

L. 204-7. Is 0.16 not more pronounced than 0.1 ( $\Delta$ albedo) of the previous sentence there? And the meaning of 'with an area ratio of 1' is unclear.

L 375-6. Unclear Point 2 is.

Provide the  $R\downarrow_{SR}$  source.

L. 437. Cap value is unclear. Note, the value seems to be kind of  $\frac{1}{2}$  h annually on average.

\*\* Visit Nature Research's author and referees' website at <http://www.nature.com/authors> for information about policies, services and author benefits\*\*

Communications Earth & Environment is committed to improving transparency in authorship. As part of our efforts in this direction, we are now requesting that all authors identified as 'corresponding author' create and link their Open Researcher and Contributor Identifier (ORCID) with their account on the Manuscript Tracking System prior to acceptance. ORCID helps the scientific community achieve unambiguous attribution of all scholarly contributions. You can create and link your ORCID from the home page of the Manuscript Tracking System by clicking on 'Modify my Springer Nature account' and following the instructions in the link below. Please also inform all co-authors that they can add their ORCIDs to their accounts and that they must do so prior to acceptance.

<https://www.springernature.com/gp/researchers/orcid/orcid-for-nature-research>

For more information please visit <http://www.springernature.com/orcid>

If you experience problems in linking your ORCID, please contact the [Platform Support Helpdesk](http://platformsupport.nature.com/).

Author Rebuttal letter: The author's response to these comments can be found at the end of this file.

Version 1:

Decision Letter:

\*\* Please ensure you delete the link to your author home page in this e-mail if you wish to forward it to your coauthors \*\*

Dear Professor Zeng,

Your manuscript titled "Observation-based assessment of photovoltaics-laying effect on land surface albedo" has now been seen by our reviewers, whose comments appear below. In light of their advice we are delighted to say that we are happy, in principle, to publish a suitably revised version in Communications Earth & Environment under the open access CC BY license (Creative Commons Attribution v4.0 International License).

We therefore invite you to revise your paper one last time to address the remaining concerns of our reviewers. At the same time we ask that you edit your manuscript to comply with our format requirements and to maximise the accessibility and therefore the impact of your work.

EDITORIAL REQUESTS:

Please review our specific editorial comments and requests regarding your manuscript in the attached "Editorial Requests Table".

\*\*\*\*\*Please take care to match our formatting and policy requirements. We will check revised manuscript and return manuscripts that do not comply. Such requests will lead to delays. \*\*\*\*\*

Please outline your response to each request in the right hand column. Please upload the completed table with your manuscript files as a Related Manuscript file.

If you have any questions or concerns about any of our requests, please do not hesitate to contact me.

#### SUBMISSION INFORMATION:

In order to accept your paper, we require the files listed at the end of the Editorial Requests Table; the list of required files is also available at <https://www.nature.com/documents/commsj-file-checklist.pdf>.

#### OPEN ACCESS:

Communications Earth & Environment is a fully open access journal. Articles are made freely accessible on publication under a [CC BY license](http://creativecommons.org/licenses/by/4.0) (Creative Commons Attribution 4.0 International License). This license allows maximum dissemination and re-use of open access materials and is preferred by many research funding bodies.

For further information about article processing charges, open access funding, and advice and support from Nature Research, please visit <https://www.nature.com/commsenv/article-processing-charges>

At acceptance, you will be provided with instructions for completing this CC BY license on behalf of all authors. This grants us the necessary permissions to publish your paper. Additionally, you will be asked to declare that all required third party permissions have been obtained, and to provide billing information in order to pay the article-processing charge (APC).

Please use the following link to submit the above items:

Link Redacted

\*\* This url links to your confidential home page and associated information about manuscripts you may have submitted or be reviewing for us. If you wish to forward this email to co-authors, please delete the link to your homepage first \*\*

We hope to hear from you within two weeks; please let us know if you need more time.

Best regards,

Sylvia Sullivan, PhD  
Editorial Board Member  
Communications Earth & Environment

Martina Grecequet, PhD  
Associate Editor,  
Communications Earth & Environment  
@CommsEarth

#### REVIEWERS' COMMENTS:

Reviewer #1 (Remarks to the Author):

The authors did a good job of revising the manuscript. I do not have further comments and it can be accepted.

Reviewer #2 (Remarks to the Author):

I want to thank the paper's Authors for the detailed and systematic answers to all the comments.

I'm satisfied with them most and ask to address the following:

1. When comparing the carbon emission reduction gained by PV installation, which includes the life cycle (LC) assessment, the ecosystem gross primary production (GPP) is not to be compared but the net ecosystem (carbon) exchange (NEE). I may not be precise enough when I wrote that comment in the first round.

2. Figure 10 caption is unclear.

And, that a larger PV area has a greater RF effect is trivial; it is better not to repeat this often.

3. The explanation for the countries' effect on the PV sites' Albedo (China, India vs. USA) is unclear. If it is a different climate, please show that and explain instead. Consider not including fig. R11.d.

I am sure those comments do not need much effort, and I wish the authors luck with the paper submission.

\*\* Visit Nature Research's author and referees' website at <a href="http://www.nature.com/authors">www.nature.com/authors</a> for information about policies, services and author benefits\*\*

Author Rebuttal letter: The author's response to these comments can be found at the end of this file.

**Open Access** This Peer Review File is licensed under a Creative Commons Attribution 4.0 International License, which permits use, sharing, adaptation, distribution and reproduction in any medium or format, as long as you give appropriate credit to the original author(s) and the source, provide a link to the Creative Commons license, and indicate if changes were made.

In cases where reviewers are anonymous, credit should be given to 'Anonymous Referee' and the source.

The images or other third party material in this Peer Review File are included in the article's Creative Commons license, unless indicated otherwise in a credit line to the material. If material is not included in the article's Creative Commons license and your intended use is not permitted by statutory regulation or exceeds the permitted use, you will need to obtain permission directly from the copyright holder.

To view a copy of this license, visit <https://creativecommons.org/licenses/by/4.0/>

1 **Response to the reviewers (COMMSENV-24-0408-T)**

2

3 **Reviewer #1 (Remarks to the Author):**

4 **Reviewer #1 General Comments:** *The manuscript by Wei et al “Observation-based*  
5 *assessment of photovoltaics-laying effect on land surface albedo” used MODIS albedo product*  
6 *and a global inventory of PV sites to quantify the impact of PV on albedo and RF. The*  
7 *environmental impact of PV has attracted growing attention nowadays, and the topic of the*  
8 *study is worth investigating. Overall, the manuscript is well-written, and the results are clear.*

9 **[Response]** We are grateful for your high compliments on the broad interest of our paper. Your  
10 constructive suggestions have enhanced the clarity and coherence of our study. We believe that  
11 all your concerns and comments have been well taken care of in the revised manuscript.

12

13 **[Reviewer #1 Major comments 1]** *The argument that climate models overestimate the albedo*  
14 *effect of PV is not supported by the analysis. Although the average albedo of PV is 0.16 by*  
15 *satellite data in this study, which is larger than 0.1 assumed in climate models, it is not*  
16 *necessarily that climate models overestimate the albedo difference without knowing the*  
17 *background albedo in climate models. If the background albedo in climate is also higher than*  
18 *that from satellite data, the albedo change could still be similar to that in satellite data. Also,*  
19 *the albedo difference is related to how PV is parametrized in climate models. Some PV*  
20 *parametrizations include variable albedo of PV (e.g., Heusinger 2019; Chang 2022).*

21 **[Response]** Thank you for your constructive comments. We acknowledge the importance of  
22 incorporating both the background albedo and the albedo of PV site when comparing the  
23 observation-based albedo change with climate modeling settings. In the revision, we have  
24 carefully summarized previous modeling studies focused on deploying PV panels on the  
25 natural ground (Table R1), providing background albedo and albedo change information in  
26 their experiment designs to support our argument.

27

28 Our satellite-observed albedo changes are much smaller than those projected changes in ESMs,  
29 implying that the assumptions in these modeling may inadequately represent the albedo and  
30 corresponding change at locations where PV panels are deployed. On the one hand, we note  
31 that some PV parameterization assumptions may not align well with real-world conditions by  
32 assigning a constant albedo for PV site, assuming solar panels cover the entire area of interest.  
33 For example, in some global-scale climate simulations deploying PVs in desert areas, PV sites  
34 are assumed to have an albedo of 0.1 (PV panel reflectivity) without accounting for the

35 typically higher background albedo in gaps between PV arrays, leading to an underestimation  
 36 of albedo at PV sites (Table R1). On the other hand, the determination of background albedo  
 37 in climate models relies on assuming fixed values on land-cover type (look-up tables) or  
 38 process-based calculations. Therefore, we have further computed the satellite-based  
 39 background albedo of the study areas in the modeling studies for comparison. The results  
 40 indicate that, for comparable background albedo conditions, the discrepancy in albedo change  
 41 between satellite data and climate model assumptions arises from the underestimated albedo of  
 42 PV sites (Li et al., 2018; Lu et al., 2020) (Table R1). Meanwhile, our comparison with Chang  
 43 *et al.* (2022) highlights discrepancies in albedo values, emphasizing the potential need for  
 44 adjustments of albedo values in regional climate modeling by using observation-based data  
 45 (Table R1).

46

47 **Table R1 (also Supplementary Table 1 in the revised manuscript). Previous studies**  
 48 **modeling the climate feedbacks from deploying solar panels on natural ground.** The  
 49 values enclosed in brackets represent the satellite-based shortwave albedo of the study area in  
 50 modeling studies. With the exception of Chang *et al.*<sup>5</sup>, whose study region aligns with one of  
 51 our PV sites, the remaining values are only the mean albedo of 2019, aimed at minimizing  
 52 computational burdens.

| Scale                     | Model            | Albedo                                             |                                                    | Albedo Change                            |                                      | Land Cover                         | Source                                  |
|---------------------------|------------------|----------------------------------------------------|----------------------------------------------------|------------------------------------------|--------------------------------------|------------------------------------|-----------------------------------------|
|                           |                  | Background                                         | PV Site                                            | Absolute                                 | Relative                             |                                    |                                         |
| <sup>a</sup> Global       | UMD<br>-ICTP     | 0.34<br>(0.3337)                                   | 0.1                                                | -0.24                                    | -71%                                 | Desert                             | Li <i>et al.</i> <sup>1</sup>           |
| <sup>a</sup> Global       | EC-<br>Earth     | ~0.2 to ~0.4<br>(0.3337)                           | 0.1                                                | ~-0.1 to<br>~-0.3                        | ~-50% to<br>~-75%                    | Desert                             | Lu <i>et al.</i> <sup>2</sup>           |
| <sup>a</sup> Regiona<br>1 | WRF              | ~0.21<br>(0.2186)                                  | 0.05                                               | ~-0.16                                   | ~-76%                                | Desert                             | Millstein<br><i>et al.</i> <sup>3</sup> |
| Regional                  | <sup>b</sup> WRF | <sup>c</sup> 0.38<br><sup>d</sup> 0.38             | <sup>c</sup> 0.16<br><sup>d</sup> 0.21             | <sup>c</sup> -0.22<br><sup>d</sup> -0.17 | <sup>c</sup> 58%<br><sup>d</sup> 55% | Barren or<br>Sparsely<br>Vegetated | Chang <i>et al.</i> <sup>4</sup>        |
| Regional                  | <sup>b</sup> WRF | <sup>c</sup> 0.25<br><sup>d</sup> 0.30<br>(0.1915) | <sup>c</sup> 0.13<br><sup>d</sup> 0.15<br>(0.1794) | <sup>c</sup> -0.12<br><sup>d</sup> -0.15 | <sup>c</sup> 48%<br><sup>d</sup> 50% | Shrubland                          | Chang <i>et al.</i> <sup>5</sup>        |

53 <sup>a</sup>: Assuming solar panels cover the interested place with 100 % coverage.

54 <sup>b</sup>: The background albedo values are found from look-up table.

55 <sup>c</sup>: Maximum albedo.

56 <sup>d</sup>: Minimum albedo.

57

58 We have clarified related contents in the revised manuscript:



59 “Previous studies have simulated the effects of PV deployment on climate<sup>10-16</sup>. Despite  
60 advancements in PV parameterization<sup>10-17</sup>, many modeling studies<sup>12-16</sup>, when characterizing the  
61 PV’s effects on the surface energy budget, ideally assign overall terrestrial albedo values to  
62 regions featuring PV panel arrays, based on simplistic assumptions.” (Page 3, Lines 62-65 in  
63 the clean version of the revised manuscript).

64  
65 “Besides, the satellite-observed albedo changes are much smaller than those projected changes  
66 in ESMs<sup>14-15</sup> (Fig. 2c,d; Supplementary Table 1). These disparities suggest that the assumptions  
67 in these modeling may inadequately represent the albedo and corresponding change at locations  
68 where PV panels are deployed.” (Page 4, Lines 112-116).

69  
70 “Understanding the unintended climate impacts of widespread solar panel deployment is  
71 crucial for tackling climate change. It's essential to practically characterize the albedo changes  
72 at PV sites to refine climate models at both global and regional levels. The overall surface  
73 mixed albedo of a PV farm reflects both the reflectivity of solar panels and that of the natural  
74 surface, accounting for the required spacing between arrays (ref. <sup>36</sup>; Supplementary Fig. 16).  
75 Given that the albedo of most land cover types exceeds 0.1 (ref. <sup>37</sup>), neglecting the background  
76 albedo in spacing in some global-scale ESM-based simulations<sup>14-15</sup>, which utilized simplified  
77 fixed albedo of 0.1 to represent PV sites over the desert, can lead to lower mixed albedo at PV  
78 sites compared to observations (Supplementary Tables 1-2). This, in turn, results in a larger  
79 relative albedo change from the background (up to 75% decrease; refs. <sup>14-15</sup>), and thus an  
80 overestimated climate response.” (Page 7, Lines 211-221).

81  
82 Furthermore, we acknowledge the advancements in PV parameterization in climate models  
83 (Taha et al., 2013; Masson et al., 2014; Chang et al., 2020; Chang et al., 2022; Heusinger et al.,  
84 2020), which now often include variable albedo. However, uncertainties arise due to scale  
85 mismatches when only a few field observations are used to represent the entire site's average  
86 albedo (e.g., Chang et al., 2022). Our analysis could provide a valuable reference to address  
87 these complexities by examining mixed albedo at PV sites (Table R2) and exploring the related  
88 albedo changes when conducting simulations at both regional and global scales. Moreover, in  
89 our study, we have investigated the influence of climate regime, background land cover, and  
90 soil moisture. We agree that further investigation into the environmental factors and PV  
91 installation characteristics is needed to fully explore the temporal dynamics. The above  
92 discussions have been added to the revised manuscript (Pages 8, Lines 222-233).

93

94 **Table R2 (Supplementary Table 4). The albedo of PV sites over the same specific land**  
95 **cover under different climate conditions. Q25 and Q75 are 25<sup>th</sup> and 75<sup>th</sup> percent interval**  
96 **quantiles, respectively.**

| Type    | Number of sites | Median | Q25    | Q75    |
|---------|-----------------|--------|--------|--------|
| OS-BWh  | 14              | 0.1915 | 0.1784 | 0.2094 |
| OS-BWk  | 7               | 0.1908 | 0.1854 | 0.1966 |
| OS-BSk  | 5               | 0.1662 | 0.1488 | 0.1714 |
| OS-Csa  | 13              | 0.1708 | 0.1474 | 0.1786 |
| WSa-Cfb | 3               | 0.1236 | 0.1139 | 0.1370 |
| Sa-Cfb  | 12              | 0.1180 | 0.1051 | 0.1309 |
| Gr-BWk  | 29              | 0.1731 | 0.1644 | 0.1877 |
| Gr-BSk  | 9               | 0.1484 | 0.1333 | 0.1616 |
| Gr-Csa  | 69              | 0.1604 | 0.1486 | 0.1717 |
| Gr-Cfb  | 3               | 0.1265 | 0.1133 | 0.1375 |
| Gr-Dwb  | 12              | 0.1488 | 0.1227 | 0.1585 |
| Gr-Dwc  | 10              | 0.1600 | 0.1557 | 0.1642 |
| Gr-Dfc  | 4               | 0.1250 | 0.1157 | 0.1623 |
| Cr-Aw   | 11              | 0.1253 | 0.1197 | 0.1391 |
| Cr-BWh  | 3               | 0.1788 | 0.1638 | 0.1813 |
| Cr-BSk  | 5               | 0.1453 | 0.1306 | 0.1525 |
| Cr-Csa  | 6               | 0.1561 | 0.1431 | 0.1810 |
| Cr-Cwb  | 3               | 0.1398 | 0.1302 | 0.1441 |
| Cr-Cfb  | 7               | 0.1234 | 0.1001 | 0.1363 |
| Cr-Dwb  | 15              | 0.1442 | 0.1386 | 0.1492 |
| Cr-Dfc  | 7               | 0.1443 | 0.1361 | 0.1504 |
| Ba-BWh  | 15              | 0.1991 | 0.1648 | 0.2276 |
| Ba-BWk  | 59              | 0.1867 | 0.1709 | 0.2037 |
| WB-Cfb  | 3               | 0.0971 | 0.0861 | 0.1003 |
| WB-Dwb  | 4               | 0.0805 | 0.0758 | 0.0938 |

97

98 **[Reviewer #1 Major comments 2]** *Comparison with other studies on the albedo impact of PV*  
99 *can be made, e.g., with recent literature (Jiang 2022; Xu 2024). The largest albedo difference*  
100 *of PV observed in open shrubland is different from other studies. I wonder the reason.*  
101 *Additionally, some earlier papers explored the radiative forcing of the albedo of PV, which is*  
102 *worth mentioning (Nemet 2009).*

103 **[Response]** Thank you for the great suggestions. Accordingly, we have added more  
 104 comparisons and discussions with other recent literatures in the revision, and updated the  
 105 following Table R3 (also Supplementary Table 2 in the revised manuscript).

106

107 **Table R3 (Supplementary Table 2). The comparison of shortwave albedo between our**  
 108 **study and other studies.**

| Longitude<br>(°)                 | Latitude<br>(°) | Satellite           |                      | In-situ observations |        | Land<br>cover       | Source                                  |
|----------------------------------|-----------------|---------------------|----------------------|----------------------|--------|---------------------|-----------------------------------------|
|                                  |                 | Background          | Change               | Background           | Change |                     |                                         |
| 95.233                           | 36.503          | <sup>a</sup> 0.2102 | <sup>a</sup> -0.0162 | 0.26                 | -0.07  | Barren              | Yang <i>et al.</i> <sup>6</sup>         |
| 100.588                          | 36.136          | <sup>a</sup> 0.1664 | <sup>a</sup> -0.0216 | 0.179                | 0.005  | Barren              | Chang <i>et al.</i> <sup>7</sup>        |
| -111.284                         | 32.555          | -                   | -                    | 0.3                  | -0.09  | Barren              | Broadbent<br><i>et al.</i> <sup>8</sup> |
| 119.793                          | 32.303          | -                   | -                    | 0.101                | -0.019 | Water<br>body       | Li <i>et al.</i> <sup>9</sup>           |
| 87.660                           | 44.410          | <sup>a</sup> 0.1916 | <sup>a</sup> -0.0100 | 0.23                 | -0.09  | Barren              | Li <i>et al.</i> <sup>10</sup>          |
| 87.660                           | 44.410          | <sup>a</sup> 0.1916 | <sup>a</sup> -0.0100 | <sup>b</sup> 0.22    | -0.08  | Barren              | Ying <i>et al.</i> <sup>11</sup>        |
| 35.059                           | 29.965          | -                   | -                    | 0.38                 | -0.21  | <sup>c</sup> Barren | Stern <i>et al.</i> <sup>12</sup>       |
| 94.250                           | 40.000          | <sup>a</sup> 0.1905 | <sup>a</sup> -0.0145 | -                    | -      | Barren              | Hua <i>et al.</i> <sup>13</sup>         |
|                                  |                 | 0.2216              | -0.0287              | -                    | -      |                     |                                         |
| <sup>d</sup> Comprehensive sites |                 | -                   | <sup>a</sup> -0.024  | -                    | -      | -                   | Zhang <i>et al.</i> <sup>14</sup>       |
|                                  |                 | -                   | -0.036               | -                    | -      | -                   |                                         |
|                                  |                 | -                   | <sup>a</sup> -0.0126 | -                    | -      | Grass-<br>lands     |                                         |
|                                  |                 | -                   | -0.014               | -                    | -      |                     |                                         |
| <sup>e</sup> Comprehensive sites |                 | -                   | <sup>a</sup> -0.0142 | -                    | -      | Barren              | Xu <i>et al.</i> <sup>15</sup>          |
|                                  |                 | -                   | -0.025               | -                    | -      |                     |                                         |
|                                  |                 | -                   | <sup>a</sup> -0.0102 | -                    | -      | Crop-<br>lands      |                                         |
|                                  |                 | -                   | -0.010               | -                    | -      |                     |                                         |

109 <sup>a</sup>: Our study.

110 <sup>b</sup>: The background for comparison is not near the PV site.

111 <sup>c</sup>: This site is located in a typical desert land under hot and arid climate conditions.

112 <sup>d</sup>: Zhang *et al.*<sup>14</sup> selected 23 PV plants (1 km resolution satellite-based albedo data), but only 17 plants  
 113 exist or have high accuracy in the PV dataset used in our study. In order to compare with their results,  
 114 here the albedo change we calculated is the mean value of the 17 PV plants.

115 <sup>f</sup>: Xu *et al.*<sup>15</sup> selected 116 solar power plants (both PV and concentrated solar power (CSP) plants with  
 116 area larger than four 1-km pixels to reduce the effect of mixed pixels) and only calculated the white-

117 sky albedo. Here we didn't select the sites they used for a detailed comparison, but rather conducted a  
118 general albedo change comparison of sites over different land use types.

119

120 Regarding the observed largest albedo difference of PV in open shrubland, it is attributed to  
121 our samples' distribution. Albedo change is influenced not only by background characteristics  
122 but also by the proportion of the PV panel area to the total area at each site (packing factor).  
123 Among the valid samples of our analyses, barren sites in the Northern Hemisphere, with higher  
124 latitudes, have PV panels inclined at steeper angles to optimize solar radiation (Fig. R1). This  
125 inclination necessitates wider gaps between arrays to minimize shading, resulting in a smaller  
126 packing factor and consequently, a less pronounced reduction in albedo. Therefore, PV sites in  
127 shrubland typically have a larger proportion of the total area covered by PV panels compared  
128 to sites in barren landscapes. We have mentioned this in the manuscript: “**Contrary to recent  
129 findings favoring greater albedo changes in barren areas (Supplementary Table 2; ref. <sup>28</sup>), we  
130 uncover a larger overall albedo decrease in shrubland sites. This likely stems from barren sites  
131 being situated at higher latitudes (Supplementary Fig. 7), resulting in steeper solar panel angles,  
132 wider PV array spacing, and ultimately, a smaller fraction of the site covered by PV panels,  
133 leading to a reduced albedo change.**” (Page 5, Lines 141-146).

134

135 Additionally, thank you for recommending this important reference. We have compared our  
136 results with Nemet *et al.* in the manuscript (Page 8, Lines 245-250): “**By 2050, according to  
137 the projected installed solar PV capacity of exceeding 18,200 GW (~37 fold the capacity in  
138 2018) in the IRENA's 1.5°C Scenario<sup>7</sup>, the global RF would potentially reach more than 1,135  
139  $\mu\text{W m}^{-2}$  (equivalent to anthropogenic carbon emissions of approximately 426 Tg C), compared  
140 with 3,300  $\mu\text{W m}^{-2}$  obtained from the idealized assessment under a similar scenario of PV  
141 installation capacity (Nemet, 2009).**”

142

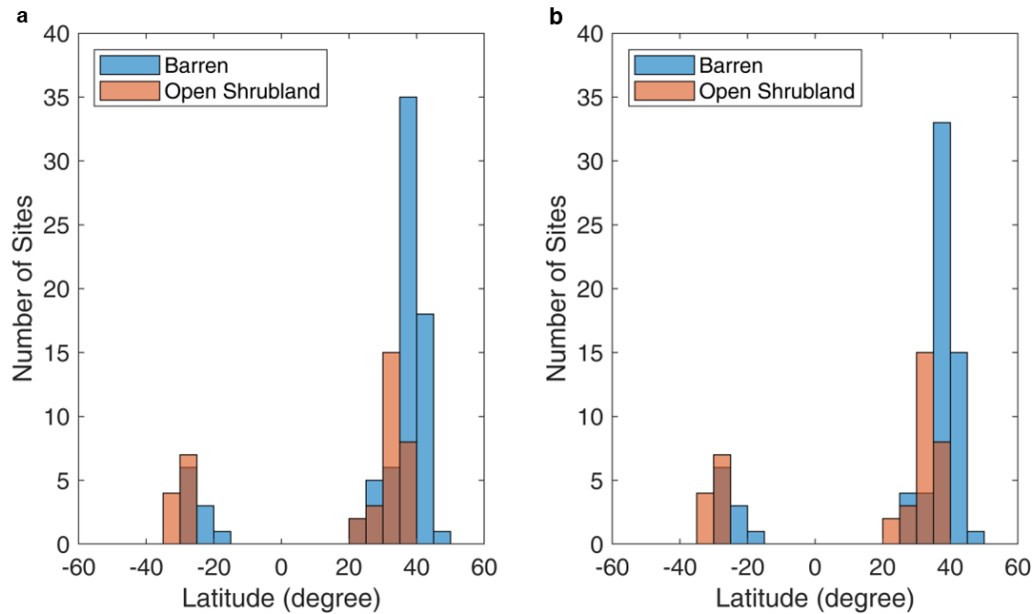

143

144 **Fig. R1 (Supplementary Figure 7). The latitude pattern comparison of PV sites over open**

145 **shrublands and barren. a**, The latitude pattern of all PV sites over open shrublands (n = 39)

146 and barren (n = 77). **b**, The latitude pattern of sites over open shrublands (n = 39) and filtered

147 sites over barren (n = 67). The barren sites included in **b** have been selectively filtered to ensure

148 that their background albedo falls within the range observed for sites over open shrublands,

149 providing a consistent comparison of background albedo between the two types of land cover.

150 Most of the PV sites located over barren (38.99°N; median) are positioned at higher latitudes

151 compared to those over open shrublands (34.06°N; median) in the Northern Hemisphere. This

152 implies that PV arrays at these barren sites require greater spacing to mitigate the shading

153 effects on the panel generation.

154

155 **[Reviewer #1 Specific comments 1] L105-109:** *PV albedo varies in different bands at different*

156 *times (hours, seasons) and is affected by many factors (Ying 2022). As for PV parameterization*

157 *in climate models, there are constant (0.1) or variable in complicated schemes (Heusinger 2019;*

158 *Chang 2022).*

159 **[Response]** Thank you for your thoughtful comments. Our study focuses on the overall mean

160 impact of PV-induced shortwave albedo change, crucial for understanding radiation energy

161 balance in climate models. We acknowledge the necessity to delve deeper into the temporal

162 variability of PV albedo in regional climate modeling to reflect its variable nature. From a

163 different perspective, our study could also contribute to this discourse by providing empirical

164 data and results regarding environmental factors such as land cover types and climate regimes.

165 These insights can help inform and refine modeling efforts in this area.

166  
167  
168  
169  
170  
171  
172  
173  
174  
175  
176  
177  
178  
179

We have clarified related contents in the manuscript and provided more discussions (refer to [Reviewer #1 Major comments 1]).

[Reviewer #1 Specific comments 2] L115-117: This can be compared with the albedo effect estimated by Xu 2024, who quantified the albedo effect of PV using many sites.

[Response] Thank you for recommending this important reference. We have added this and other observation-based results in Supplementary Table 2, and the updated table is shown as Table R3 (refer to [Reviewer #1 Major comments 2]). Additionally, we have revised related contents on Pages 5, Lines 141-146 in the manuscript.

[Reviewer #1 Specific comments 3] Fig 2. Please add a zero tick on panel c and d.

[Response] We have revised this figure by adding grey lines to represent the zero value.

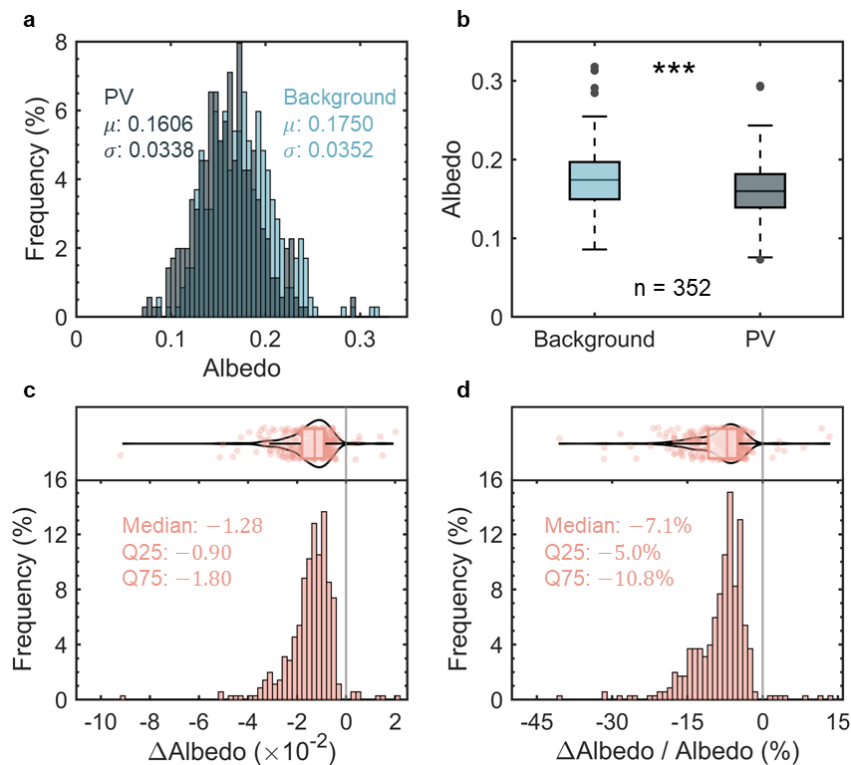

180  
181  
182  
183  
184  
185

**Fig. R2 (Fig. 2). Analysis and comparison of mean albedo at PV sites and their corresponding backgrounds.**

[Reviewer #1 Specific comments 4] L136-137: The largest albedo decrease in open shrubland is unexpected. As seen from table S3, albedo change is largest over barren land.

186 **[Response]** Thank you for highlighting this discrepancy. Indeed, when examining all PV sites  
187 collectively, those situated over open shrubland demonstrate the most significant reduction in  
188 albedo. This apparent contradiction arises from the geographical distribution of the sample sites,  
189 as discussed previously under [Reviewer #1 Major comments 2]. However, when considering  
190 sites within a specific country, sites in barren areas exhibit a larger albedo reduction  
191 (Supplementary Table 3). We have added detailed descriptions to clarify this point in the  
192 manuscript on Page 5, Lines 141-146.

193

194 **[Reviewer #1 Specific comments 5] L202-208:** *This argument is not convincing. If a constant*  
195 *albedo of 0.1 is applied in climate models, it is unclear how much albedo changes are in models*  
196 *relative to its background albedo. The analysis only shows albedo change from satellite data.*

197 **[Response]** In the revision, we acknowledged the significance of considering both the  
198 background albedo and the albedo of PV panels in affecting albedo changes. We compiled  
199 background albedo and albedo change information in previous modeling studies concentrating  
200 on PV deployment on natural ground (Table R1), revealing substantially higher albedo changes  
201 compared to our satellite-observed evidences and observation-based results from other  
202 literatures (Tables R2 and R3).

203

204 Moreover, we have expanded the discussion by providing potential avenues for refining  
205 PV-induced albedo changes in climate models as follows: **“Understanding the unintended**  
206 **climate impacts of widespread solar panel deployment is crucial for tackling climate change.**  
207 **It's essential to practically characterize the albedo changes at PV sites to refine climate models**  
208 **at both global and regional levels. The overall surface mixed albedo of a PV farm reflects both**  
209 **the reflectivity of solar panels and that of the natural surface, accounting for the required**  
210 **spacing between arrays (ref. <sup>36</sup>; Supplementary Fig. 16). Given that the albedo of most land**  
211 **cover types exceeds 0.1 (ref. <sup>37</sup>), neglecting the background albedo in spacing in some global-**  
212 **scale ESM-based simulations<sup>14-15</sup>, which utilized simplified fixed albedo of 0.1 to represent PV**  
213 **sites over the desert, can lead to lower mixed albedo at PV sites compared to observations**  
214 **(Supplementary Tables 1-2). This, in turn, results in a larger relative albedo change from the**  
215 **background (up to 75% decrease; refs. <sup>14-15</sup>), and thus an overestimated climate response.”**  
216 (Page 7, Lines 211-221).

217

218 **“Introducing the packing factor, a parameter representing the percentage of interested land**  
219 **covered by panels in the PV site<sup>10,38</sup>, into global-scale Earth system simulations offers a**

220 straightforward method to address this concern. It enables the mixed albedo of regions with PV  
221 installations to more accurately align with observed values and refine the heterogeneity in PV-  
222 induced albedo change caused by the underlying background characteristics.” (Pages 8, Lines  
223 222-226).

224

225 **[Reviewer #1 Specific comments 6] L368-375:** *What would the results be if PV grid fractions*  
226 *were not considered? What if directly comparing the albedo differences?*

227 **[Response]** Thank you for your question. Direct comparisons without considering the specific  
228 fraction of the grid covered by PV panels (Fig. R3) could substantially underestimate the true  
229 impact of the PV installations on albedo changes due to the inclusion of background land cover.  
230 Some studies address this uncertainty by imposing constraints on the size of photovoltaic fields  
231 (e.g. Xu et al., 2024); however, this approach may still overlook this key concern and could  
232 reduce the number of available PV sites for assessing the impact on albedo.

233

234 To better understand the extent of this potential underestimation, we analyzed the relative  
235 difference between albedo change calculated by our linear parameterization method and that  
236 by direct comparisons across 352 selected sites. Our findings show that ~82% of sites exhibit  
237 positive differences, with a median value of 37% (Fig. R4), suggesting a notable  
238 underestimation in the albedo change calculated by direct comparison. This comparison  
239 underscores the potential for substantial underestimation when not accounting for PV grid  
240 fractions and validates the robustness of our method. Related revisions in the manuscript are  
241 on Pages 13-14, Lines 398-401.

242

243 We have added related figures in the SI:



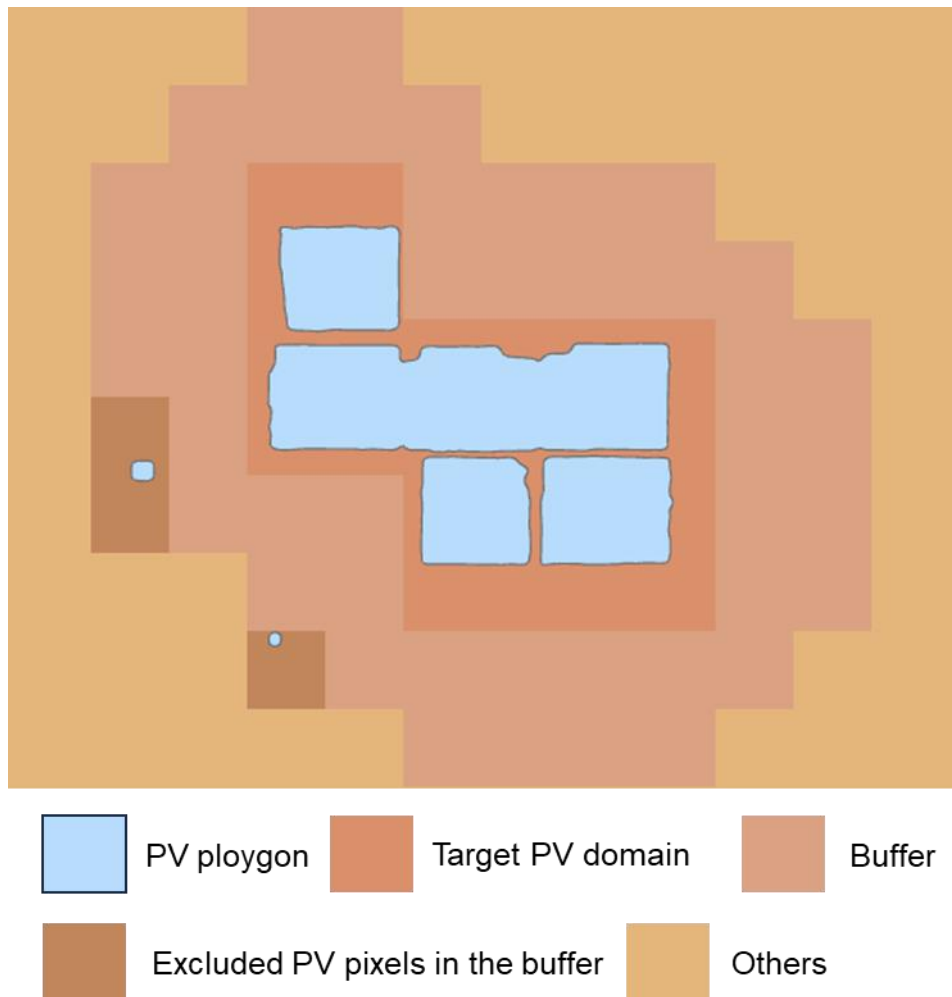

244

245

246

247

248

249

250

**Fig. R3 (Supplementary Figure 20). The diagram of creating a buffer near a target PV domain (site).** To create a buffer zone with a width of 2 pixels around a selected PV connected region, a dilation operation is used to enlarge the target PV region by adding two pixels around its edges. Any other PV regions within the buffer zone, apart from the target PV domain, are excluded.

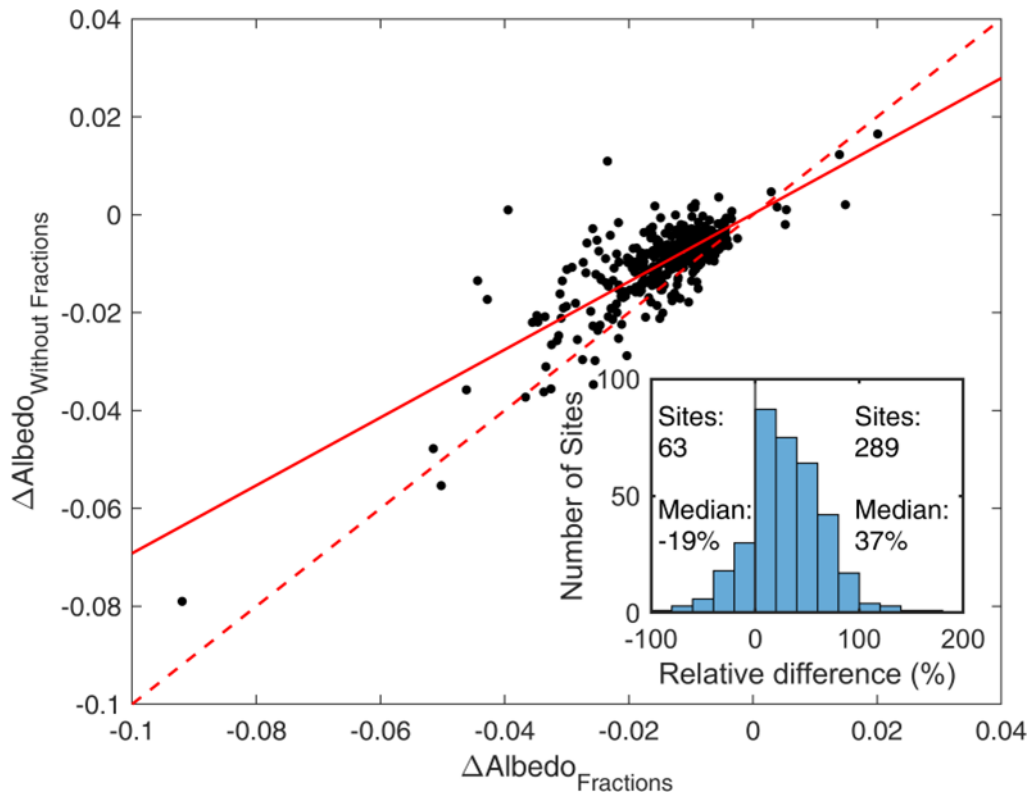

251

252 **Fig. R4 (Supplementary Figure 21). The comparison of absolute albedo change ( $\Delta\text{Albedo}$ )**  
 253 **over 352 selected PV sites between considering the PV grid fractions and without**  
 254 **considering the fractions.** The red solid line represents the line of equality ( $x=y$ ), while the  
 255 dashed line indicates the fitting line. The inset details the ratio of differences in albedo change  
 256 with and without PV grid fractions to albedo change with PV grid fractions. A relative  
 257 difference greater than zero indicates that the albedo change is greater when considering PV  
 258 grid fractions. Additionally, the inset captions provide the count of sites with relative  
 259 differences both greater and less than zero, along with their respective median  
 260 difference values.

261

262 Finally, thank you for reviewing our paper and for providing your useful comments/suggestions.

263 We have acknowledged this in the paper:

264 **“We acknowledge the anonymous reviewers for their detailed and helpful comments to the**  
 265 **original manuscript.”** (Page 22, Lines 645-647).

266

267 **References:**

268 Chang, R., et al., 2020. Simulated local climatic impacts of large-scale photovoltaics over the  
 269 barren area of Qinghai, China. *Renewable Energy*. 145, 478-489.

270 Chang, R., et al., 2022. A coupled WRF-PV mesoscale model simulating the near-surface  
271 climate of utility-scale photovoltaic plants. *Solar Energy*, **245**, 278–289.

272 Heusinger, J., et al., 2020. Introduction, evaluation and application of an energy balance model  
273 for photovoltaic modules. *Solar Energy*. **195**, 382–395.

274 Li, S., et al., 2017. The Potential for Climate Impacts from Widespread Deployment of Utility-  
275 Scale Solar Energy Installations: An Environmental Remote Sensing Perspective. *Journal of*  
276 *Remote Sensing & GIS*. **6**, 1–5.

277 Masson et al., 2014. Solar panels reduce both global warming and urban heat island. *Frontiers*  
278 *in Environmental Science*. 2, 14.

279 Stern, R., et al., 2023. Photovoltaic fields largely outperform afforestation efficiency in global  
280 climate change mitigation strategies. *Proceedings of the National Academy of Sciences Nexus*.  
281 **2**, pgad352.

282 Taha, H., 2013. The potential for air-temperature impact from large-scale deployment of solar  
283 photovoltaic arrays in urban areas. *Solar Energy*. 91, 358-367.

284 Xu, Z., et al., 2024. A global assessment of the effects of solar farms on albedo, vegetation, and  
285 land surface temperature using remote sensing. *Solar Energy*. **268**, 112198.

286

287

288 **Reviewer #2 (Remarks to the Author):**

289 **Reviewer #2 General Comments:** *Considering the need to increase the electrical supply to*  
290 *the humanity growing demand sharply, and at the same time to reduce fossil fuel emitted*  
291 *greenhouse gasses to the atmosphere, currently a major source of CO<sub>2</sub> emission, the*  
292 *importance of green alternative energy becomes a necessary solution. Large-scale photovoltaic*  
293 *(PV) field installations in sunny regions could become primary electricity production sources.*  
294 *However, it is now well recognized that large scale, land cover changes, could have direct*  
295 *effects on the land- atmosphere energy exchanges that affect the Earth's radiative forcing and*  
296 *the climate system. The driven effects by the land cove changes could contradict the CO<sub>2</sub>-*  
297 *suppressing cooling impact on the climate.*

298 *In his paper Sihuan Wei et. al., assess the radiative forcing balance, result from existing PV*  
299 *installation fields by comparing the eliminating CO<sub>2</sub> emission due to the green electrical*  
300 *manufacturing vs. the albedo change effect of the installed dark PV sheets over that surface.*  
301 *For their analyzing assessments, the authors used the electrical output of the study sites to*  
302 *calculate the alternative CO<sub>2</sub>-prevented emission against the change in the surface albedo*  
303 *calculated by remote sensing techniques. The strength of this study is in the large areas it has*  
304 *performed: area-wise, of about 20% of the identified PV sites in their survey, and the use of*  
305 *remote sensing to identify the sites' areas, and to calculate the albedo change by the PV cover*  
306 *over the PV site.*

307 *It is an interesting paper and clear, but it suffers from several major drawbacks:*

308 **[Response]** We highly appreciate your approval of our work. We also sincerely thank you for  
309 the insightful comments and suggestions that greatly helped us to improve this study. Following  
310 these suggestions and comments, we have substantially revised the manuscript. We have  
311 provided a more explicit explanation of the primary objective of our study, added a more  
312 detailed description of the methodology, and involved additional analyses and discussions. We  
313 believe these revisions have substantially improved the manuscript, addressing the issues you  
314 highlighted and enhancing the overall quality of our study.

315

316 **[Reviewer #2 Specific comments 1]** *In the calculation of the Carbon suppression, the*  
317 *difference between the carbon uptake by the surface before the PV installation to the carbon*  
318 *'uptake' by the PV field should be considered. This presumable, for most sites, will extend the*  
319 *breakeven duration.*

320 **[Response]** Thank you for emphasizing the importance of accounting for pre-installation  
321 carbon sequestration levels in our PV carbon suppression analysis. In response, we've

322 conducted a comprehensive examination to assess how PV installations affect the land's  
323 inherent carbon sequestration capability, with a specific focus on the carbon avoidance (CA)  
324 from PV generation and changes in Gross Primary Production (GPP). Details of the methods  
325 of additional analyses have been provided in the Supplementary Materials (Pages 2-3, Lines  
326 45-65 in the SI).

327

328 The additional analyses reveal that while GPP generally decreases at PV sites (Fig. R5a), the  
329 magnitude of this reduction is minimal (within a range of  $\pm 5\%$ ) compared to the carbon  
330 emissions avoided (CA) by using solar energy instead of coal-fired electricity (Fig. R5b). Clean  
331 electricity generation from PV systems at most sites (Fig. R6) offsets their adverse albedo  
332 impacts within a single year, indicating a relatively short breakeven duration (Fig. R7). This  
333 suggests a cooling effect in subsequent years of PV operation, emphasizing the positive role of  
334 deploying PV panels in mitigating global warming. These findings and their associated  
335 discussions have been incorporated into the revised manuscript (Pages 8-9, Lines 251-260 in  
336 the clean version of revised manuscript).

337

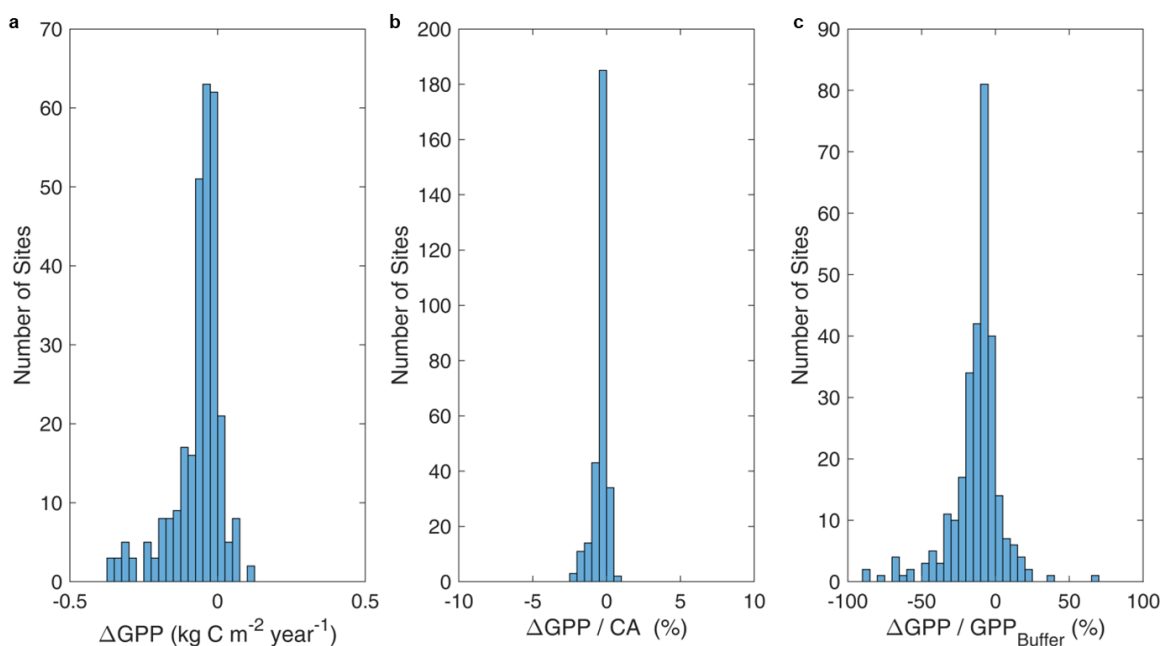

338

339 **Fig. R5 (also Supplementary Figure 19 in the revised manuscript). The influence of PV**  
340 **installation on Gross Primary Productivity (GPP).** **a**, The GPP difference between the PV  
341 site and the corresponding buffer zone. **b**, the comparison between the changed GPP and carbon  
342 avoidance (CA; Supplementary *Methods*) by PV generation. **c**, The ratio of GPP change value  
343 to the buffer zone's GPP.

344

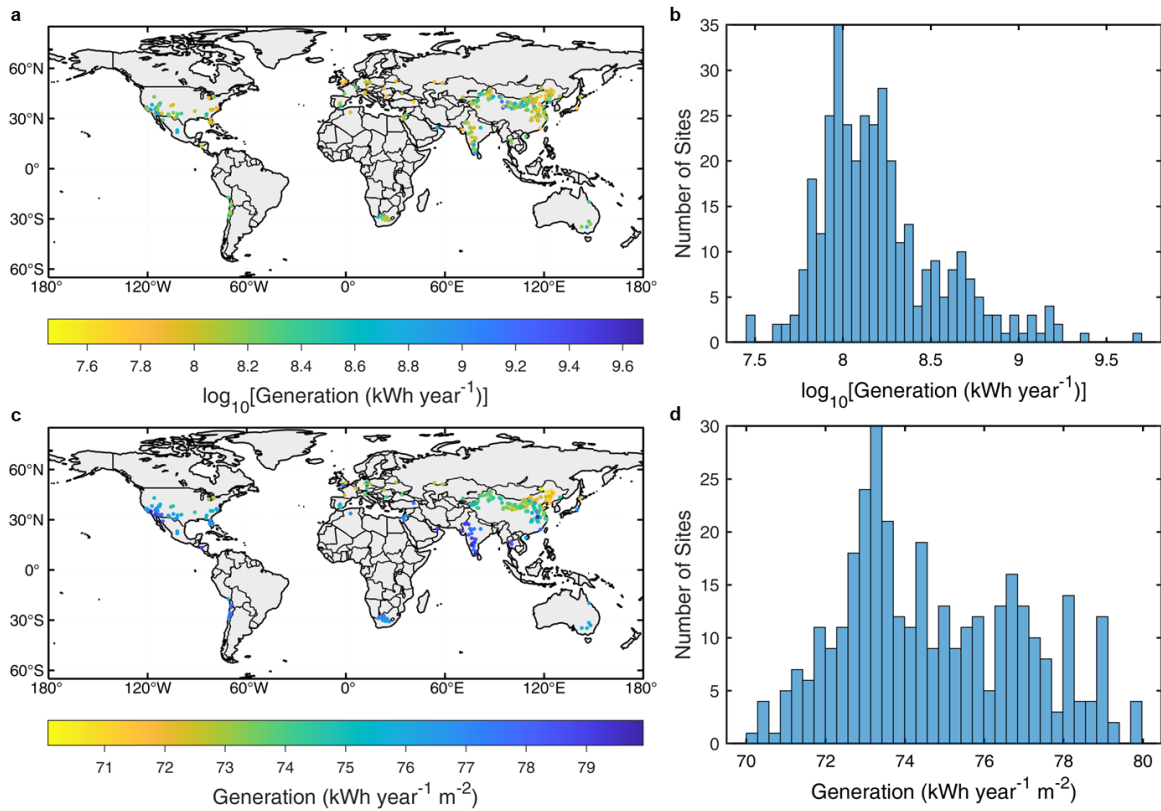

345  
346  
347  
348  
349

**Fig. R6 (Supplementary Figure 17).** The yearly total generation and generation per unit of each PV site. **a** and **b** show the spatial pattern and histogram of the total generation per PV site, while **c** and **d** show the generation per unit of each PV site.

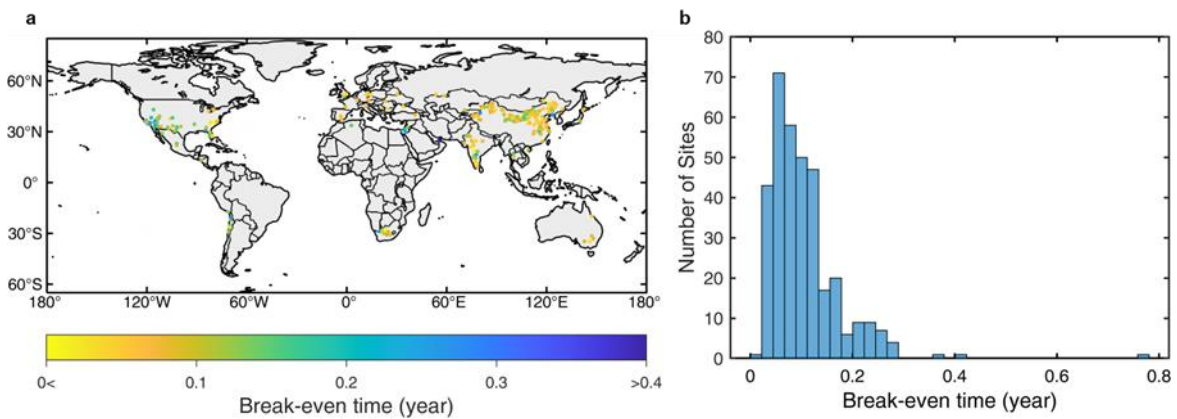

350  
351  
352  
353  
354

**Fig. R7 (Supplementary Figure 18).** The break-even time of each PV site. **a**, Spatial pattern of sites' break-even time. **b**, The frequency distribution histogram of PV sites' break-even time. Only positive values are shown.

355 **[Reviewer #2 Specific comment 2]** For future assessment of the climatic impact of a site at a  
356 given location for possible PV installations and for comparing the RF among sites and other

357 uses, the relative forcing effect per unit of area is needed. Please reconsider the conclusions  
358 drawn in Line (L) 186.

359 **[Response]** Thank you for your valuable comments regarding the importance of assessing the  
360 climatic impact of PV installations in terms of relative forcing per unit area.

361

362 Initially, we primarily focused on global-scale radiative forcing (global RF, derived from local  
363 RF) at the top of the atmosphere (TOA). This approach of calculating global RF and the related  
364 carbon equivalence allowed us to make land-surface albedo change comparable to changes in  
365 atmospheric CO<sub>2</sub> concentrations (Nemet, 2009; Bright et al., 2013; Bright et al., 2016). We  
366 now recognize the importance of local radiative forcing (local RF) in understanding regional  
367 climatic impacts. Therefore, we have included an analysis of local (relative) RF, accounting for  
368 constant atmospheric transmittance factor ( $T_{SR}^{\uparrow}$ ), as depicted in Figs. R8 and R9). Details of the  
369 methods of additional analyses have been provided in the *Supplementary Materials* (Page 2,  
370 Lines 35-43 in the SI).

371

372 The related analyses and descriptions have been added in the revised manuscript: “**We further**  
373 **examine the local RF (Supplementary Methods), crucial for regional energy budget, which**  
374 **ranges from -4.48 W m<sup>-2</sup> to 20.56 W m<sup>-2</sup> (Fig. R8). Notably, the desert site in the United Arab**  
375 **Emirates exhibits the most significant positive local RF value, because of its exceptionally**  
376 **large albedo change compared to other sites (Supplementary Figs. 5, 15 and 16), suggesting**  
377 **that deploying PV on desert land could lead to a larger temperature disturbance.” (Page 7, Lines**  
378 **202-207).**

379

380 Regarding the relative importance of the three impact factors on global RF, we have found that  
381 the area’s impact on RF is more pronounced due to its extensive variability across multiple  
382 orders of magnitude, compared to albedo change and radiation (Fig. R10). Additionally,  
383 concerning the factors influencing local RF, we found that albedo change plays a more  
384 dominant role compared to radiation (Fig. R9). We have modified these conclusions and  
385 updated these figures in the revised manuscript (Page 7, Lines 194-202).

386

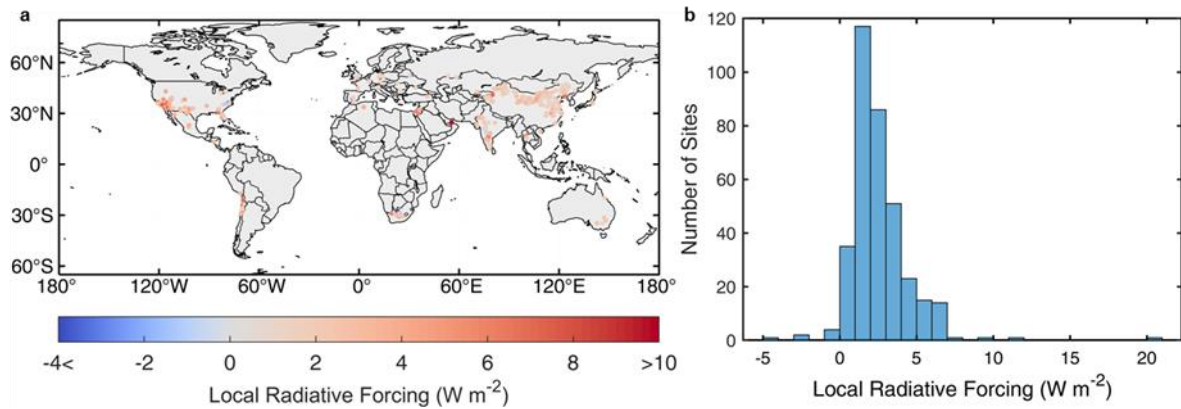

387  
388  
389  
390  
391

**Fig. R8 (Supplementary Figure 14). The local radiative forcing (RF) of the 352 PV sites.**  
a, Spatial pattern of sites' local RF. b, The histogram of corresponding local RF in the 352 PV sites.

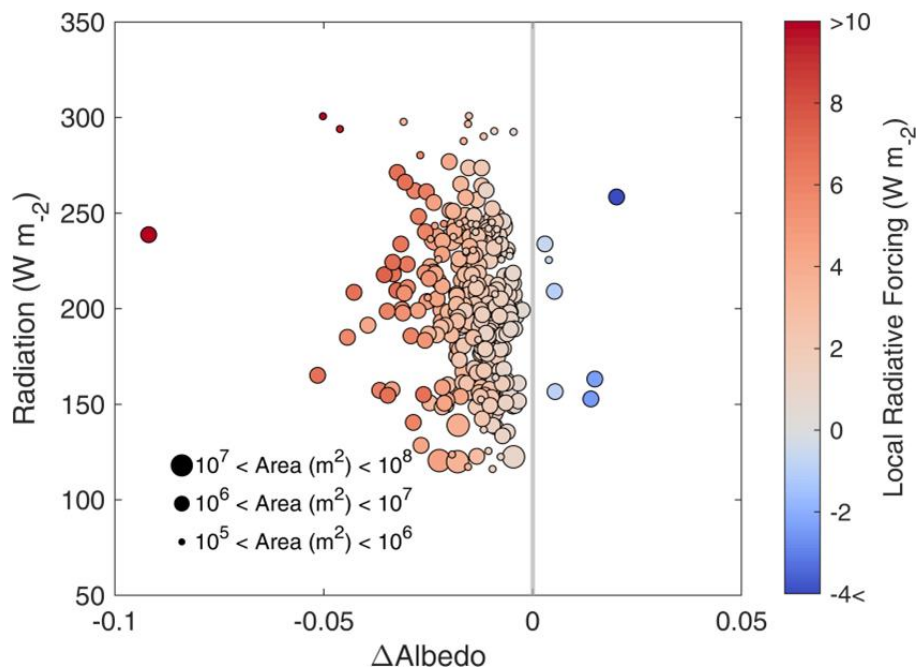

392  
393  
394  
395  
396  
397

**Fig. R9 (Supplementary Figure 16). Drivers influencing local radiative forcing (RF).** The grey line shows the zero value of albedo change. The greater the deviation from the zero line, the more significant the change in shortwave forcing, highlighting the dominant role of albedo change compared to radiation.



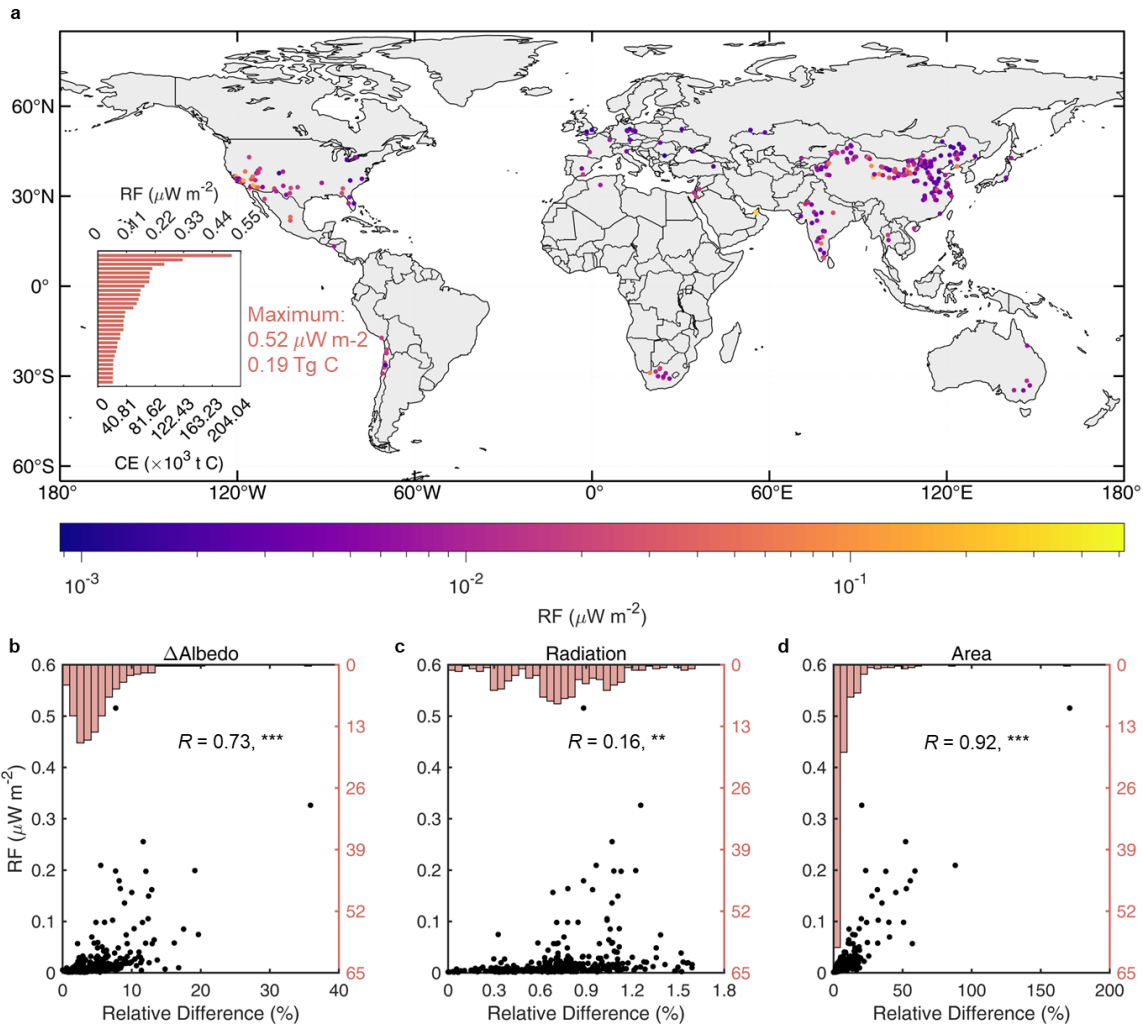

398

399

400

401

402

403

404

405

406

407

408

409

410

411

412

413

**Fig. R10 (also Fig. 5 in the manuscript). The global radiative forcing (RF) and carbon equivalence (CE) due to albedo change.** **a**, The spatial pattern of the global RF caused by PV deployment. The insert shows the top 30 sites' RF values alongside corresponding anthropogenic carbon equivalence. **b-c**, Three key variables determining the global RF at the top of the atmosphere. The relative differences are expressed as the absolute percentage changes of each variable relative to its respective minimum absolute value. The captions show the Pearson partial correlation coefficients between RF and each variable (\*  $P < 0.05$ , \*\*  $P < 0.01$ , \*\*\*  $P < 0.001$ ), respectively. 7 sites with negative RF are not shown in the figure above.

**[Reviewer #2 Specific comment 3]** Unclear are the significant Albedo differences among countries (e.g., Figure 3)? Is it because of the PV's types, the installation procedure, by the different ecosystem types, or? Otherwise, why will it be a country-dependent variable?

**[Response]** Thank you for your comments regarding the observed significant albedo differences among countries. Our findings demonstrate varied albedo changes across different land cover types and notable variations among countries with the same land-cover type. This

414 suggests additional factors beyond land cover influence these changes. Therefore, we further  
 415 discuss the influence from other factor, like climate regimes and soil moisture. Our results  
 416 highlight the significant role of climate regime in influencing albedo changes, shedding light  
 417 on the phenomenon of country-dependent albedo differences.

418

419 We have refined and expanded related contents in the manuscript: “Moreover, we find that the  
 420 categories of sites in different land-cover types from the United States significantly differ from  
 421 those of China and India (Fig. 3d). This indicates that, despite consistent land-cover types, the  
 422 reduction in albedo at PV sites exhibits notable spatial variation, suggesting the influence of  
 423 factors beyond land-cover types.

424 Further analysis reveals that climate regime plays a pivotal role in influencing albedo  
 425 changes, even when considering the same land cover type (Fig. 4 and Supplementary Fig. 8).”  
 426 (Page 6, Lines 153-159).

427

428 We have also modified the previous Fig. 3 (Fig. R11) to enhance the logic flow of the  
 429 description and improve the clarity of our results.

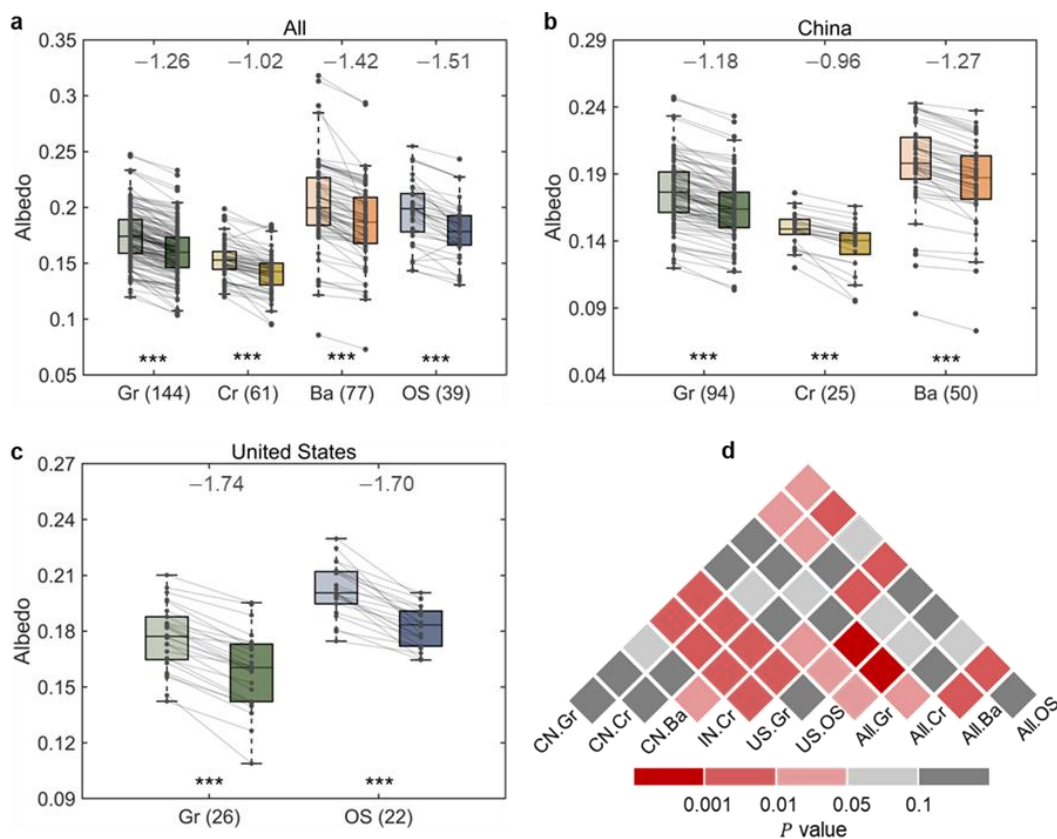

430

431 **Fig. R11 (Fig. 3).** The albedo change of sites covered by PV panels in different land-cover  
 432 types and countries. a-c, Boxplots of the background albedo (higher transparency) and the

433 albedo in the site covered by PV panels (lower transparency) for different land-cover types  
434 with the paired points connected by gray line. The captions show the median values of absolute  
435 albedo change. Gr, Cr, Ba, and OS represent sites in grasslands, croplands, barren and open  
436 shrublands, respectively. The numbers in parentheses after land-cover types represent the  
437 corresponding number of samples. Paired t-test is used to test the significant difference between  
438 the PV site's mean albedo (with 100% coverage of PV facilities) and background albedo (with  
439 0% coverage of PV facilities) (\*  $P < 0.05$ , \*\*  $P < 0.01$ , \*\*\*  $P < 0.001$ ). **d**, Illustration of the  
440 significant-difference-level of albedo change between two groups of sites (by using Wilcoxon  
441 rank sum test) in specific land-cover type from the corresponding country in **a-c**, respectively.  
442 All and US represent sites in the United States and all the countries, respectively.

443

444 **[Reviewer #2 Specific comments 4]** *Throughout the calculations, the time scale of the albedo*  
445 *change for the radiative forcing-driven values is unclear (Methods part). For example, are*  
446  *$R_{\downarrow SR}$  and the  $\Delta Albedo$  averages in equation 6 annually average? Have those values weighted*  
447 *by seasonal and daily RSR changes?*

448 **[Response]** Thank you for highlighting the need for clarity regarding the time scale in our  
449 calculations. The  $\bar{R}_{\downarrow SR}^{\downarrow}$  and the  $\Delta Albedo$  averages in equation 6 are three-year averages (2019-  
450 2021), although we treat the albedo RF as an instantaneous event. Here  $\Delta Albedo$  values are  
451 calculated from three-year weighted albedo averages, the calculation of which considers the  
452 daily and monthly radiation variations. Specifically, we first calculate the daily mean blue-sky  
453 albedo, which is then used to derive monthly weighted albedo values. These monthly values  
454 are weighted by corresponding daily downward shortwave radiation, reflecting daily radiative  
455 dynamics. Subsequently, we aggregated these monthly weighted albedo values into three-year  
456 weighted averages, utilizing the monthly downward shortwave radiation for weighting, which  
457 are then used in the linear parameterization method to calculate albedo change.

458

459 Here we have provided more details in the methods: “**The hourly land-surface shortwave**  
460 **radiation values were derived by scaling the daily average radiation, as provided by the BESS**  
461 **radiation product<sup>47</sup>, against the daily average extraterrestrial radiation. This ratio adjusts the**  
462 **daily radiation values to an hourly scale, reflecting variations in extraterrestrial radiation**  
463 **throughout the day, under the assumption of consistent atmospheric conditions<sup>29</sup>” (Page 12,**  
464 **Lines 349-353).**

465

466 “The hourly grid albedo values were subsequently used to derive daily, monthly and three-year  
467 (2019-2021) weighted averages by utilizing corresponding time-scale downward shortwave  
468 radiation.” (Page 13, Lines 368-370).

469

470 “We assume that the global effect of PV RF due to albedo change is instantaneous<sup>29</sup>.  
471 Nevertheless, the characterization of instantaneous RF relies on the mean albedo change (2019-  
472 2021), derived through the linear parameterization method based on the three-year weighted  
473 grid albedo values (2019-2021). Hence, the RF of radiance imbalance from albedo change can  
474 be quantified as follows:

$$475 \quad RF_{\Delta Albedo} = - \frac{\bar{R}_{SR}^{\downarrow} \overline{\Delta Albedo} T_{SR}^{\uparrow} A_{PV}}{A_E} \quad (6)$$

476 where  $\bar{R}_{SR}^{\downarrow}$  is the three-year average incident shortwave radiation (2019-2021) at the terrestrial  
477 surface ( $W m^{-2}$ ),  $\overline{\Delta Albedo}$  is the mean albedo change due to PV deployment, which is  
478 calculated from the three-year weighted average grid albedo (2019-2021) by using the linear  
479 parameterization method (Fig. 1e),  $A_{PV}$  represents the scope area covered by PV facilities in a  
480 PV site,  $A_E$  denotes the Earth’s surface area ( $510 \times 10^6 km^2$ ), and  $T_{SR}^{\uparrow}$  is the upward  
481 transmittance constant, set at 0.854 (ref. <sup>60</sup>).” (Page 15, Lines 446-457).

482

483 **[Reviewer #2 Specific comments 5]** *The term  $\mu Wm^{-2}$  needs explanation. It is likely the*  
484 *projected global average (all Earth’s surface, annually, and for which year?) RF penalty of PV*  
485 *installation? Then, consider presenting this against the benefit of CO<sub>2</sub> suppression by the PV’s.*

486 **[Response]** The term  $\mu Wm^{-2}$  denotes microwatts per square meter, a unit measuring the  
487 intensity of radiative forcing over a given area. In our study, the global PV-albedo radiative  
488 forcing (global RF) at the top of the atmosphere (unit:  $W m^{-2}$  or  $\mu Wm^{-2}$ ) demonstrates the global  
489 effect of PV installation that is assumed to take place instantaneously, not at an annual scale or  
490 a specific year. We have further clarified related contents more in the manuscript (refer to  
491 [Reviewer #2 Specific comment 2] and [Reviewer #2 Specific comments 4]).

492

493 The approach of calculating global RF and the related carbon equivalence allowed us to make  
494 surface albedo changes comparable to changes in atmospheric CO<sub>2</sub> concentrations.  
495 Additionally, we have further compared it with the benefit of CO<sub>2</sub> suppression by calculating  
496 the reduced carbon emissions ( $CE_{gen}$ ) and the carbon avoidance ( $CA$ ) by PV generation (Page  
497 16, Lines 458-473 in the manuscript; Page 2, Lines 45-51 in the Supplementary *Methods*). Our

498 analysis shows that compared to the coal-fired plants, the clean electricity generation from PV  
499 generation in most sites (Fig. R6) offsets their adverse albedo impacts within a single year  
500 (break-even time; Fig. R7). This indicates a cooling effect in the subsequent years of PV  
501 operation, emphasizing the positive role of deploying PV panels in mitigating global warming.

502

503 **[Reviewer #2 Specific comments 6]** *The PV field albedo value depends on the spacing area*  
504 *between PV rows and the PV sheets' angles, which affect the electricity production efficiency*  
505 *per unit area at a given site. Since it is a global-scale study that may served decision-makers,*  
506 *prior to PV installation decisions in future work, it is recommended that the authors elaborate*  
507 *more on electrical output per a unit area of PV field.*

508 **[Response]** Thank you for your valuable suggestions. We acknowledge the influence of the  
509 spacing area between PV rows and the PV sheets' angles on PV field albedo, which has been  
510 discussed more on Page 5, Lines 141-146 in the revised manuscript.

511

512 Additionally, we have analyzed the electrical output per unit area of the PV field (Fig. R6, also  
513 Supplementary Fig. 18). We have added related results in the manuscript: “Annual generation  
514 at PV sites varies from  $2.84 \times 10^7$  to  $4.74 \times 10^9$  kWh year<sup>-1</sup>, while electrical output per unit  
515 area ranges from 70.06 to 79.94 kWh year<sup>-1</sup> m<sup>-2</sup>(Supplementary Fig. 18).” (Pages 8-9, Lines  
516 254-256).

517

518 In terms of related implications, it would be helpful to use more efficient solar panels to  
519 improve PV generation per unit in future deployment, thus reducing the break-even time and  
520 enhance PV's climatic benefits. We have also added related contents in the manuscript:  
521 “Transitioning lands to PV farms requires optimizing PV generation per unit area and  
522 minimizing the albedo reduction to shorten break-even times. Utilizing more efficient solar  
523 panels increases electrical output per area and land-use efficiency<sup>39</sup>, thereby reducing the  
524 break-even time through enhanced carbon avoidance (Supplementary Methods) and decreased  
525 positive global RF due to smaller land requirements.” (Page 9, Lines 275-278).

526

527 **[Reviewer #2 Specific comments 7]** *This study concentrated on the albedo change radiative*  
528 *forcing; however, PV also has other RF impacts, as well as environmental and ecological*  
529 *aspects that must consider as well (e.g., <https://doi.org/10.1093/pnasnexus/pgad352>) before*  
530 *converting an area to a PV site.*

531 **[Response]** Thank you for your valuable comments. We acknowledge that PV also have other  
532 RF impacts like longwave forcing, which may extend the break-even time. We have added  
533 related contents in the Discussion part: “However, our estimation of break-even time is  
534 idealized and does not include several specific factors that could potentially prolong this period.  
535 These factors include the omission of other PV-related radiative forcing, such as longwave  
536 forcing, and the use of idealized PV generation calculations involving overlooking the  
537 degradation of PV generation efficiency over time. Additionally, we do not consider the carbon  
538 sequestration changes in natural lands caused by PV installations, as these are relatively minor  
539 compared to the carbon offsets at the PV site (Supplementary Fig. 19).” (Page 9, Lines 261-  
540 270 in the manuscript).

541  
542 Additionally, we have also refined and expanded the final part of the Discussion to highlight  
543 the environmental and ecological aspects regarding PV deployment:

544 “However, the deployment of PV panels also carries potential environmental and ecological  
545 risks<sup>24</sup>. Changes in carbon sequestration from PV installations on natural lands, though might  
546 be minor compared to the carbon avoidance of generation, are unneglectable compared to the  
547 land’s original state (Supplementary Fig. 19a,c). This is mainly due to landscape reshaping<sup>38</sup>,  
548 influencing local native vegetation dynamics and soil microbial characteristics<sup>43</sup>. Consequently,  
549 ecologically rich lands and vital ecosystems should be avoided by the energy industry<sup>44</sup>.  
550 Additionally, in certain croplands requiring high solar radiation or day-night temperature  
551 difference, the shading of solar panels reduces crop yield and quality<sup>45,46</sup>. Floating PV systems  
552 may also influence water quality<sup>42</sup>, warranting comprehensive impact studies. In relative terms,  
553 converting highly degraded barren to a solar farm, despite suffering from its positive radiative  
554 forcing and potential extension of energy payback time, may be more cost-effective when  
555 considering land and ecosystem service values, making it a suitable priority target for  
556 conversion. Therefore, future PV expansion requires careful consideration to maximize the  
557 climatic benefits and minimize ecological disruptions and environmental influences.” (Page 10,  
558 Lines 287-301).

559  
560 **[Reviewer #2 Minor comments 1]** L. 188. Unclear are the ‘relatively concentrated variations’  
561 and the connection to Fig. 2.c.

562 **[Response]** Thank you for your feedback. We have revised related contents in the manuscript  
563 for clarity: “In contrast, changes in albedo and radiation exhibit narrower ranges of variation  
564 (Fig. 2c and Supplementary Fig. 13), making their impacts on the RF less substantial compared



565 **to that of the area.**” (Page 7, Lines 194-196). Additionally, we have updated Fig. 5 (Fig. R9) to  
566 illustrate this more clearly.

567

568 **[Reviewer #2 Minor comments 2]** *L. 204-7. Is 0.16 not more pronounced than 0.1 ( $\Delta$ albedo)*  
569 *of the previous sentence there? And the meaning of ‘with an area ratio of 1’ is unclear.*

570 **[Response]** Thank you for pointing out the potential confusion in our manuscript. To clarify,  
571 the values 0.16 and 0.1 refer to the observed mean albedo at PV sites and the albedo assumed  
572 in some previous studies (e.g., Li et al., 2018), respectively, and not changes in albedo  
573 ( $\Delta$ Albedo). We acknowledge that the original presentation could lead to misunderstanding, so  
574 we have revised this section to enhance clarity (Page 7, Lines 208-218; Supplementary Tables  
575 1-3).

576

577 The term 'with an area ratio of 1' might not be immediately clear to readers as it is indeed a  
578 technical term. This phrase was intended to describe the scenario in our linear parameterization  
579 method where the entire grid cell is completely occupied by a PV site. In the revision, we have  
580 removed this description.

581

582 **[Reviewer #2 Minor comments 3]** *L 375-6. Unclear Point 2 is. Provide the  $R_{\downarrow}SR$  source.*

583 **[Response]** We have made Point 2 clearer: **“(2) the difference between the maximum and**  
584 **minimum area ratio values across all pixels within an individual PV site should be larger than**  
585 **0.5;”** (Page 14, Lines 405-407).

586

587 Regarding the  $R_{\downarrow}SR$  source, it is cited on Page 11, Lines 311-313 of the manuscript, which is  
588 also included in the section of data availability (Page 16, 483-490).

589

590 **[Reviewer #3 Minor comments 4]** *L. 437. Cap value is unclear. Note, the value seems to be*  
591 *kind of  $\frac{1}{2}$  h annually on average.*

592 **[Response]** We have clarified *Cap* value more in the manuscript: **“*CI* is the carbon dioxide**  
593 **intensity ( $900 \text{ g CO}_2 \text{ kWh}^{-1}$ ) of coal-fired plants in 2018 (ref. <sup>62</sup>), *CF* is the mean capacity factor**  
594 **(0.11) of solar PV in the world<sup>63</sup> and *Cap* (kW) is the total capacity of a PV site, which is the**  
595 **sum of estimated nominal peak alternating current generating capacities of each solar**  
596 **generating units in the site. Each solar generating unit corresponds to a vector polygon in the**

597 global PV dataset, where the capacity of each unit has been evaluated based on its size, the  
598 efficiency of the solar panels, and other factors<sup>30</sup>.” (Page 16, Lines 475-481).

599

600 Additionally, as for the ‘ $\frac{1}{2} h$ ’, if you are referring to the operating of PV only in the hours of  
601 daytime, here the yearly generation of each PV site is calculated by utilizing capacity factor  
602 (CF), which has involved the considerations of ‘ $\frac{1}{2} h$ ’, and therefore the total annual hours of  
603 operation are 8760 h (Eq 2 in Lee et al., 2022).

604

605 Finally, thank you for reviewing our paper and for providing your useful comments/suggestions.  
606 We have acknowledged this in the paper:

607 “We acknowledge the anonymous reviewers for their detailed and helpful comments to the  
608 original manuscript.” (Page 22, Lines 645-647).

609

#### 610 **References:**

611 Bright, R. M., et al., 2013. Technical Note: Evaluating a simple parameterization of radiative  
612 shortwave forcing from surface albedo change. *Atmospheric Chemistry and Physics*. **13**,  
613 11169-11174.

614 Bright R. M., et al., 2016. Carbon-equivalent metrics for albedo changes in land management  
615 contexts: relevance of the time dimension. *Ecological Applications*. **26**: 1868-1880.

616 Li, Y., et al., 2018. Climate model shows large-scale wind and solar farms in the Sahara increase  
617 rain and vegetation. *Science*. **361**, 1019-1022.

618 Lee N., et al., 2020. Hybrid floating solar photovoltaics-hydropower systems: Benefits and  
619 global assessment of technical potential. *Renewable Energy*. **162**, 1415-1427.

620 Nemet, G. F., 2009. Net Radiative Forcing from Widespread Deployment of Photovoltaics.  
621 *Environmental Science & Technology*. **43**, 2173-2178.



## **Response to the reviewers (COMMSENV-24-0408A)**

**Reviewer #1 (Remarks to the Author):** *The authors did a good job of revising the manuscript. I do not have further comments and it can be accepted.*

**[Response]** Thank you for your positive feedback and for acknowledging our revisions. We appreciate your support and valuable suggestions throughout the review process.

**Reviewer #2 (Remarks to the Author):** *I want to thank the paper's Authors for the detailed and systematic answers to all the comments.*

*I'm satisfied with them most and ask to address the following:*

**[Response]** Thank you for acknowledging our responses to your comments. Moreover, we have revised related contents to address your remaining concerns. We appreciate your valuable suggestions and believe that these changes have further improved our manuscript.

**[Reviewer #2 Specific comments 1]** When comparing the carbon emission reduction gained by PV installation, which includes the life cycle (LC) assessment, the ecosystem gross primary production (GPP) is not to be compared but the net ecosystem (carbon) exchange (NEE). I may not be precise enough when I wrote that comment in the first round.

**[Response]** Thank you for pointing this out. We attempted to use NEE to compare the carbon emission reduction gained by PV installation. However, because of the small PV site areas, there are currently no publicly available satellite-based NEE data with sufficient spatial resolution for analysis. In our revised manuscript, we've compared the carbon emission reduction gained by PV with the net primary production (NPP) for instead. The results show that the change in NPP is small compared to the carbon avoidance from PV generation (Fig. R1b). Since NEE is smaller than NPP ( $NEE = NPP - \text{soil respiration}$ ), the change in NEE is relatively smaller compared to the carbon avoidance achieved by PV installations.

Details of the methods of additional analyses have been revised in the Supplementary Materials (Page 2, Lines 46-66 in the Supplementary Methods).

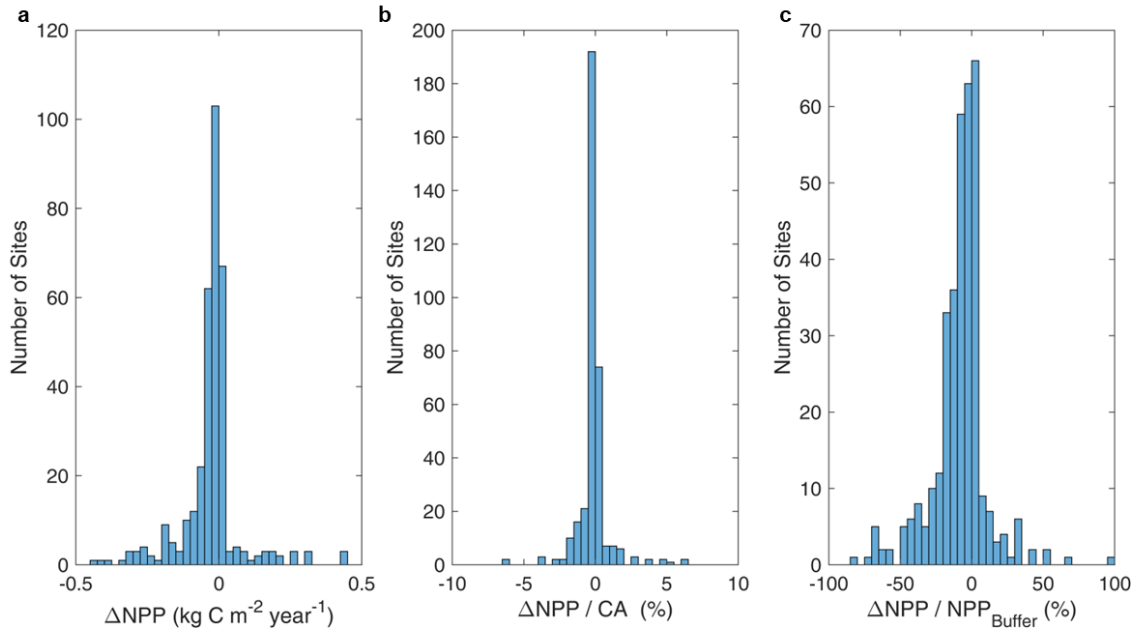

**Fig. R1 (also Supplementary Figure 20 in the revised manuscript). The influence of PV installation on Net Primary Productivity (NPP). a,** The NPP difference between the PV site and the corresponding buffer zone. **b,** The comparison between the changed NPP and carbon avoidance (CA; Supplementary Methods) by PV generation. **c,** The ratio of NPP change value to the buffer zone's NPP.

[Reviewer #2 Specific comments 2] *Figure 10 caption is unclear.*

[Response] Thank you. We have made it clearer.

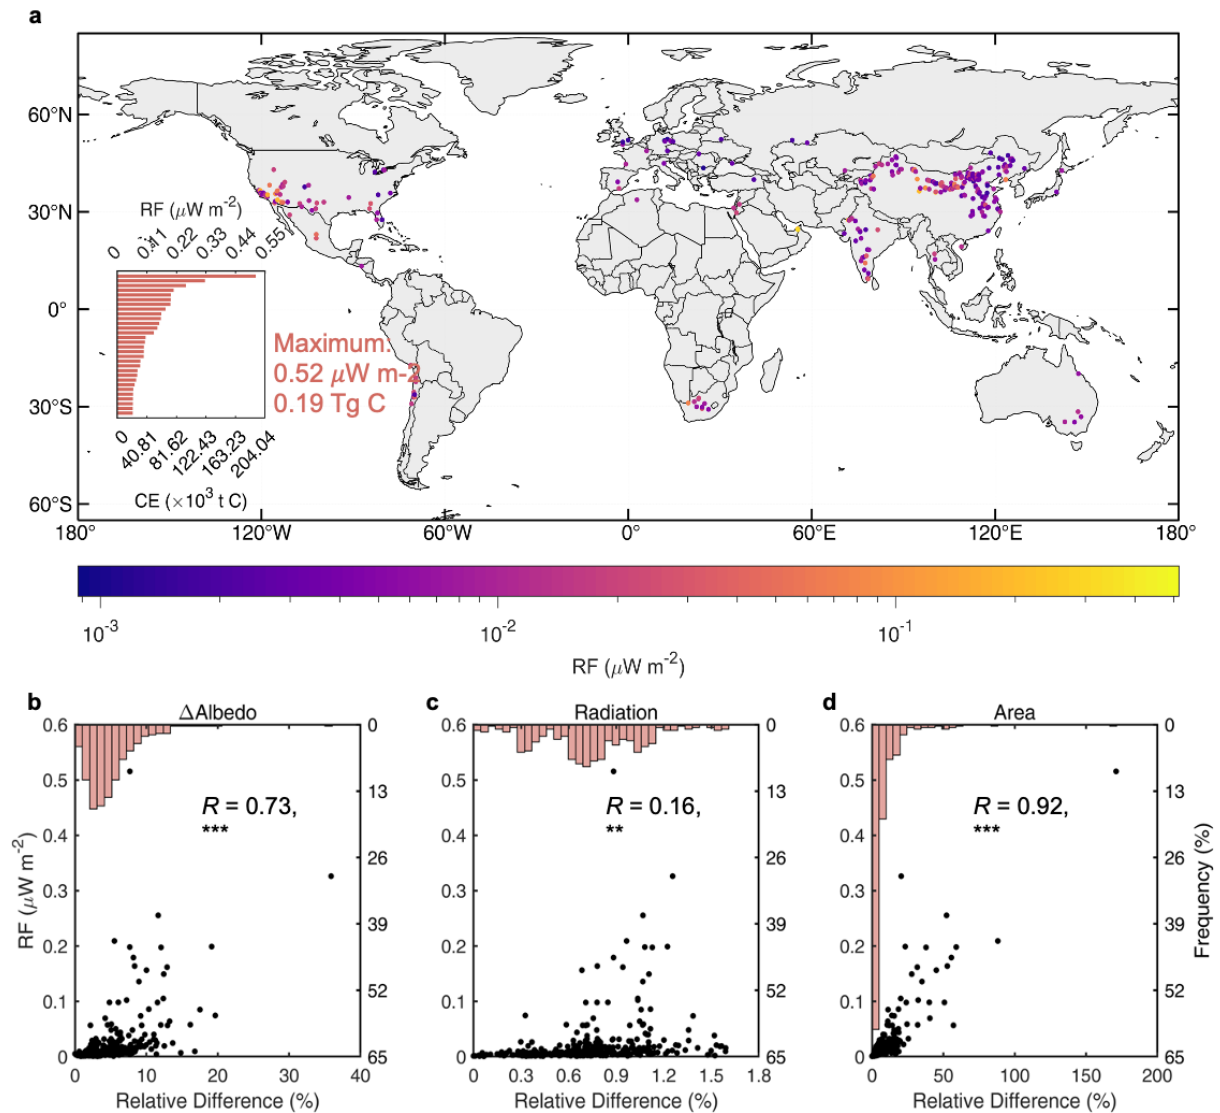

**Fig. R2 (also Fig. 5 in the manuscript). The global radiative forcing (RF) and carbon equivalence (CE) due to albedo change.** **a**, The spatial pattern of the global RF caused by PV deployment. The insert shows the top 30 sites' RF values alongside corresponding anthropogenic carbon equivalence. **b-d**, The relationship between three key variables—albedo change, mean downward shortwave radiation, PV site area—and the global RF at the top of the atmosphere. The relative differences are expressed as the absolute percentage changes of each variable relative to its respective minimum absolute value. The black scatters show the relationship between RF and relative difference of corresponding variable, while the upper bars represent the frequency distribution of relative difference. The captions show the Pearson partial correlation coefficients between RF and each variable (\*  $P < 0.05$ , \*\*  $P < 0.01$ , \*\*\*  $P < 0.001$ ), respectively. 7 sites with negative RF are not shown in the figure above.

**[Reviewer #2 Specific comments 3]** *And, that a larger PV area has a greater RF effect is trivial; it is better not to repeat this often.*

**[Response]** Thank you for your great advice. We agree that a larger PV area has a greater global RF effect is trivial. We have revised related contents to be more concise: “**The area’s impact on RF is more pronounced due to its extensive variability across multiple orders of magnitude, compared to albedo change and radiation (Fig. 5b-d).**” (Page 7, Lines 195-196 in the manuscript). Meanwhile, we have also removed the relevant content from the discussion section in the manuscript (Page 8, Lines 230-240 in the manuscript).

**[Reviewer #2 Specific comments 4]** *The explanation for the countries' effect on the PV sites' Albedo (China, India vs. USA) is unclear. If it is a different climate, please show that and explain instead. Consider not including fig. R11.d.*

**[Response]** Thank you for highlighting this point. We have further compared grassland sites between China and United States, where enough samples are available, to explore whether different climates cause varying albedo change across countries. We found that their climates are not identical (Fig. R3a,b). Additionally, even under the same climatic conditions, the albedo change of the sites may vary due to differences in PV panels arrays spacing caused by latitude (Fig. R3c), the influence of which has been mentioned on Page 5, Lines 136-139 in the manuscript. Moreover, we have excluded Fig. R11d (also Fig. 3d in the manuscript).

Related contents have been revised in the manuscript (Page 6, Lines 159-168): “**We also explore whether different climates cause varying albedo changes across countries. A comparison of sites over grasslands in China and the United States, where sufficient samples are available, reveals that nearly 25% of PV sites over grasslands in China are located under cold and dry winter conditions (Dwa, Dwb, and Dwc regimes; Supplementary Fig. 9a,b), with a median albedo change of  $-1.02 \times 10^{-2}$ . In contrast, no such sites exist in the United States, potentially contributing to the lower albedo change at PV sites over grasslands in China. Nonetheless, even for grassland sites under similar climatic conditions (e.g., BSk regime), the albedo changes at PV sites in the two countries differ ( $-1.27 \times 10^{-2}$  in China;  $-1.74 \times 10^{-2}$  in the United States). This disparity could be attributed to the different PV array spacing**

induced by variations in latitude (Supplementary Fig. 9c).”

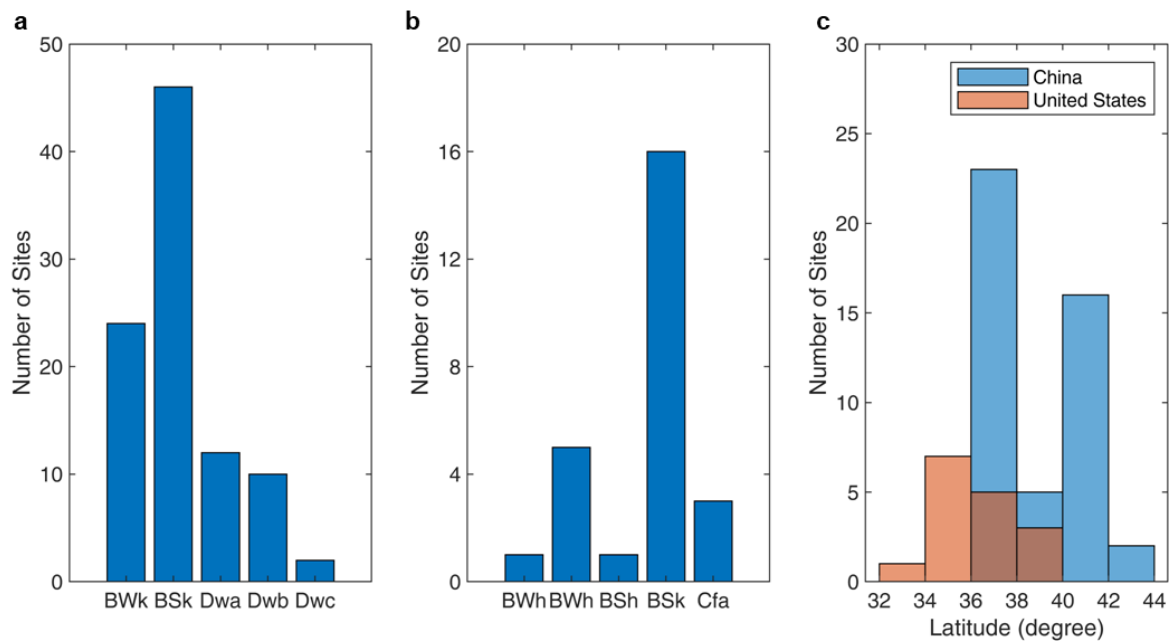

**Fig. R3. (also Supplementary Fig. 9 in the manuscript) The comparison of albedo change over grassland PV sites between China and the United States. a,** The counts of grassland PV sites under different climate regimes in China. **b,** The counts of grassland PV sites under different climate regimes in the United States. **c,** The latitude distributions of grassland PV sites under BSk regime in China and the United States, respectively.
