# Supplementary material for: Small reduction in land surface albedo due to solar panel expansion worldwide
Source: Springer Nature journal article supplement (doi:10.1038/s43247-024-01619-w), 2024-08-30
Supplement: 43247_2024_1619_MOESM2_ESM.pdf [file 43247_2024_1619_MOESM2_ESM.pdf]

## 29 **Supplementary Methods**

30

### 31 **Local radiative forcing due to albedo change**

32 At the global scale, radiative forcing reflects the energy balance of the entire Earth's  
33 atmospheric system, influenced by global climate change factors such as changes in  
34 atmospheric greenhouse gas concentrations and solar radiation intensity. Local radiative  
35 forcing focuses more on radiation imbalances within specific regions, often associated with  
36 local weather systems or topography. Here, assuming the constant atmospheric transmittance  
37 factor, the local (relative) radiative forcing caused by PV-induced albedo change is simply  
38 expressed as follows:

$$39 \quad LRF_{\Delta Albedo} = \frac{RF_{\Delta Albedo} A_E}{A_{PV}} \quad (1)$$

40 where  $RF_{\Delta Albedo}$  is the global radiative forcing caused by PV-induced albedo change,  $A_{PV}$   
41 represents the scope area covered by PV facilities in a PV site,  $A_E$  denotes the Earth's surface  
42 area ( $510 \times 10^6 \text{ km}^2$ ).

43

### 44 **Carbon avoidance from PV generation**

45 Carbon avoidance ( $CA$ ) is defined as the reduced carbon emissions each year from a PV  
46 site's generation per unit compared to coal-fired plants, which is written as follows:

$$47 \quad CA = \frac{CE_{gen}}{A_{PV}} - 8760 \cdot \lambda \cdot LCA \cdot CF \cdot Cap \quad (2)$$

48 where  $CE_{gen}$  is the yearly reduced carbon emissions from the PV site's generation, compared  
49 to coal-fired plants. Additionally, 8,760 present the corresponding number of hours in a year.  
50  $LCA$  is the life cycle carbon emission of PV installations, which is assumed as  $0.026 \text{ kg C}$   
51  $\text{kWh}^{-1}$  in this study<sup>1</sup>.

52

### 53 **Directly comparing the NPP differences**

54 We compared the remotely sensed Net Primary Production (NPP) variations in space, to  
55 represent the influenced carbon sink of natural land surface caused by PV deployment. We  
56 downloaded annual NPP information from 2019 to 2021 from the MOD17A3HGF v061  
57 product (available at <https://lpdaac.usgs.gov/products/mod17a3hgf061/>), which provides data  
58 information at 500 m pixel. The linear parameterization method used for calculating albedo  
59 change is not suitable for estimating the NPP change because the regression result is not robust  
60 (Supplementary Fig. 23). In order to detect the PV-induced NPP change preliminary, we

61 directly compared the NPP between a PV site and its corresponding buffer zone (with a width  
62 of 2 pixels; Supplementary Fig. 21). The PV-induced NPP change can be written as follows:

63 
$$\Delta NPP = \overline{NPP}_{PV} - \overline{NPP}_{Buffer} \quad (3)$$

64 where  $\Delta GPP$  represents the mean NPP change caused by PV deployment,  $\overline{NPP}_{PV}$  and  
65  $\overline{NPP}_{Buffer}$  are the 3-year averaged NPPs (2019-2021) in the PV site and buffer zone  
66 respectively.

67

68 **Supplementary Table 1. Previous studies modeling the climate feedbacks from deploying**  
69 **solar panels on natural ground.** The values enclosed in brackets represent the satellite-based  
70 shortwave albedo of the study area in modeling studies. With the exception of Chang *et al.*<sup>5</sup>,  
71 whose study region aligns with one of our PV sites, the remaining values are only the mean  
72 albedo of 2019, aimed at minimizing computational burdens.

| Scale                      | Model            | Albedo                                             |                                                    | Albedo Change                            |                                      | Land Cover                         | Source                                  |
|----------------------------|------------------|----------------------------------------------------|----------------------------------------------------|------------------------------------------|--------------------------------------|------------------------------------|-----------------------------------------|
|                            |                  | Background                                         | PV Site                                            | Absolute                                 | Relative                             |                                    |                                         |
| <sup>a</sup> Global        | UMD<br>-ICTP     | 0.34<br>(0.3337)                                   | 0.1                                                | -0.24                                    | -71%                                 | Desert                             | Li <i>et al.</i> <sup>2</sup>           |
| <sup>a</sup> Global        | EC-<br>Earth     | ~0.2 to ~0.4<br>(0.3337)                           | 0.1                                                | ~-0.1 to<br>~-0.3                        | ~-50% to<br>~-75%                    | Desert                             | Lu <i>et al.</i> <sup>3</sup>           |
| <sup>a</sup> Regional<br>1 | WRF              | ~0.21<br>(0.2186)                                  | 0.05                                               | ~-0.16                                   | ~-76%                                | Desert                             | Millstein<br><i>et al.</i> <sup>4</sup> |
| Regional                   | <sup>b</sup> WRF | <sup>c</sup> 0.38<br><sup>d</sup> 0.38             | <sup>c</sup> 0.16<br><sup>d</sup> 0.21             | <sup>c</sup> -0.22<br><sup>d</sup> -0.17 | <sup>c</sup> 58%<br><sup>d</sup> 55% | Barren or<br>Sparsely<br>Vegetated | Chang <i>et al.</i> <sup>5</sup>        |
| Regional                   | <sup>b</sup> WRF | <sup>c</sup> 0.25<br><sup>d</sup> 0.30<br>(0.1915) | <sup>c</sup> 0.13<br><sup>d</sup> 0.15<br>(0.1794) | <sup>c</sup> -0.12<br><sup>d</sup> -0.15 | <sup>c</sup> 48%<br><sup>d</sup> 50% | Shrubland                          | Chang <i>et al.</i> <sup>6</sup>        |

73 <sup>a</sup>: Assuming solar panels cover the interested place with 100 % coverage.

74 <sup>b</sup>: The background albedo values are found from look-up table.

75 <sup>c</sup>: Maximum albedo.

76 <sup>d</sup>: Minimum albedo.

77

78 **Supplementary Table 2. The comparison of shortwave albedo between our study and**  
 79 **other studies.**

| Longitude<br>(°)                 | Latitude<br>(°) | Satellite           |                      | In-situ observations |        | Land<br>cover       | Source                                  |                |
|----------------------------------|-----------------|---------------------|----------------------|----------------------|--------|---------------------|-----------------------------------------|----------------|
|                                  |                 | Background          | Change               | Background           | Change |                     |                                         |                |
| 95.233                           | 36.503          | <sup>a</sup> 0.2102 | <sup>a</sup> -0.0162 | 0.26                 | -0.07  | Barren              | Yang <i>et al.</i> <sup>7</sup>         |                |
| 100.588                          | 36.136          | <sup>a</sup> 0.1664 | <sup>a</sup> -0.0216 | 0.179                | 0.005  | Barren              | Chang <i>et al.</i> <sup>8</sup>        |                |
| -111.284                         | 32.555          | -                   | -                    | 0.3                  | -0.09  | Barren              | Broadbent<br><i>et al.</i> <sup>9</sup> |                |
| 119.793                          | 32.303          | -                   | -                    | 0.101                | -0.019 | Water<br>body       | Li <i>et al.</i> <sup>10</sup>          |                |
| 87.660                           | 44.410          | <sup>a</sup> 0.1916 | <sup>a</sup> -0.0100 | 0.23                 | -0.09  | Barren              | Li <i>et al.</i> <sup>11</sup>          |                |
| 87.660                           | 44.410          | <sup>a</sup> 0.1916 | <sup>a</sup> -0.0100 | <sup>b</sup> 0.22    | -0.08  | Barren              | Ying <i>et al.</i> <sup>12</sup>        |                |
| 35.059                           | 29.965          | -                   | -                    | 0.38                 | -0.21  | <sup>c</sup> Barren | Stern <i>et al.</i> <sup>1</sup>        |                |
| 94.250                           | 40.000          | <sup>a</sup> 0.1905 | <sup>a</sup> -0.0145 | -                    | -      | Barren              | Hua <i>et al.</i> <sup>13</sup>         |                |
|                                  |                 | 0.2216              | -0.0287              | -                    | -      |                     |                                         |                |
| <sup>d</sup> Comprehensive sites |                 | -                   | <sup>a</sup> -0.024  | -                    | -      | -                   | Zhang <i>et al.</i> <sup>14</sup>       |                |
|                                  |                 | -                   | -0.036               | -                    | -      | -                   |                                         |                |
| <sup>e</sup> Comprehensive sites |                 | -                   | <sup>a</sup> -0.0126 | -                    | -      | Grass-<br>lands     | Xu <i>et al.</i> <sup>15</sup>          |                |
|                                  |                 | -                   | -0.014               | -                    | -      |                     |                                         |                |
|                                  |                 | -                   | <sup>a</sup> -0.0142 | -                    | -      | Barren              |                                         |                |
|                                  |                 | -                   | -0.025               | -                    | -      |                     |                                         |                |
|                                  |                 | -                   | <sup>a</sup> -0.0102 | -                    | -      |                     |                                         | Crop-<br>lands |
|                                  |                 | -                   | -0.010               | -                    | -      |                     |                                         |                |

80 <sup>a</sup>: Our study.

81 <sup>b</sup>: The background for comparison is not near the PV site.

82 <sup>c</sup>: This site is located in a typical desert land under hot and arid climate conditions.

83 <sup>d</sup>: Zhang *et al.*<sup>14</sup> selected 23 PV plants (1 km resolution satellite-based albedo data), but only  
 84 17 plants exist or have high accuracy in the PV dataset used in our study. In order to compare  
 85 with their results, here the albedo change we calculated is the mean value of the 17 PV plants.

86 <sup>f</sup>: Xu *et al.*<sup>15</sup> selected 116 solar power plants (both PV and concentrated solar power (CSP)  
 87 plants with area larger than four 1-km pixels to reduce the effect of mixed pixels) and only  
 88 calculated the white-sky albedo. Here we didn't select the sites they used for a detailed  
 89 comparison, but rather conducted a general albedo change comparison of sites over different  
 90 land use types.

91 **Supplementary Table 3. The absolute and relative albedo change of filtered sites covered**  
 92 **by PV panels.** Each category contains three kind of statistics, the first shows the number of  
 93 sites, the second and third show the median (IQR) of the absolute albedo change ( $\times 10^{-2}$ ) and  
 94 the relative albedo change (%), respectively.

| Country       | Land-cover type      |                      |                      |                      |                      |                      |
|---------------|----------------------|----------------------|----------------------|----------------------|----------------------|----------------------|
|               | Grasslands           | Croplands            | Barren               | Open Shrublands      | Others               | Total                |
| All           | 144                  | 61                   | 77                   | 39                   | 31                   | 352                  |
|               | -1.26 (-1.82, -0.86) | -1.02 (-1.39, -0.77) | -1.42 (-1.82, -1.01) | -1.51 (-2.17, -1.09) | -1.41 (-2.03, -0.95) | -1.28 (-1.80, -0.90) |
|               | -7.3 (-10.4, -4.7)   | -6.7 (-8.9, -5.1)    | -6.6 (-8.6, -5.2)    | -7.0 (-10.7, -6.2)   | -12.5 (-15.9, -7.3)  | -7.1 (-10.8, -5.0)   |
|               |                      |                      |                      |                      |                      |                      |
| China         | 94                   | 25                   | 50                   | 0                    | 19                   | 188                  |
|               | -1.18 (-1.79, -0.80) | -0.96 (-1.22, -0.77) | -1.27 (-1.55, -0.97) | -                    | -1.62 (-2.03, -1.22) | -1.23 (-1.65, -0.84) |
|               | -6.5 (-9.4, -4.2)    | -6.5 (-7.9, -5.0)    | -6.3 (-7.6, -4.6)    | -                    | -13.5 (-17.0, -9.5)  | -6.7 (-9.4, -4.7)    |
|               |                      |                      |                      |                      |                      |                      |
| United States | 26                   | 4                    | 7                    | 22                   | 8                    | 67                   |
|               | -1.74 (-2.16, -1.33) | -2.55 (-3.24, -2.04) | -2.58 (-3.15, -1.85) | -1.70 (-2.69, -1.31) | -0.54 (-1.45, 0.60)  | -1.73 (-2.37, -1.31) |
|               | -9.7 (-12.7, -7.2)   | -14.9 (-17.5, -12.0) | -12.9 (-16.0, -11.3) | -8.8 (-12.7, -6.6)   | -4.0 (-10.9, -0.7)   | -9.8 (-13.1, -6.7)   |
|               |                      |                      |                      |                      |                      |                      |
| India         | 8                    | 14                   | 4                    | 4                    | 0                    | 30                   |
|               | -1.38 (-1.75, -0.81) | -0.87 (-1.19, -0.57) | -1.89 (-2.70, -1.24) | -1.52 (-1.62, -1.32) | -                    | -1.15 (-1.62, -0.77) |
|               | -8.6 (-10.1, -5.5)   | -6.3 (-8.9, -4.7)    | -8.1 (-12.1, -5.2)   | -6.3 (-6.7, -6.3)    | -                    | -6.5 (-9.2, -5.3)    |
|               |                      |                      |                      |                      |                      |                      |
| Others        | 16                   | 18                   | 16                   | 13                   | 4                    | 67                   |
|               | -1.20 (-1.68, -1.14) | -1.08 (-1.35, -0.88) | -1.61 (-2.56, -1.01) | -1.15 (-1.38, -0.90) | -1.96 (-3.06, -1.23) | -1.19 (-1.70, -0.97) |
|               | -8.1 (-11.1, -6.2)   | -6.9 (-8.4, -5.7)    | -7.5 (-13.8, -5.4)   | -6.4 (-9.2, -4.4)    | -15.7 (-21.2, -10.9) | -7.1 (-9.7, -5.7)    |
|               |                      |                      |                      |                      |                      |                      |

95  
96

97 **Supplementary Table 4. The albedo of PV sites over the same specific land cover under**  
 98 **different climate conditions.** Q25 and Q75 are 25<sup>th</sup> and 75<sup>th</sup> percent interval quantiles,  
 99 respectively.

| Type    | Number of sites | Median | Q25    | Q75    |
|---------|-----------------|--------|--------|--------|
| OS-BWh  | 14              | 0.1915 | 0.1784 | 0.2094 |
| OS-BWk  | 7               | 0.1908 | 0.1854 | 0.1966 |
| OS-BSk  | 5               | 0.1662 | 0.1488 | 0.1714 |
| OS-Csa  | 13              | 0.1708 | 0.1474 | 0.1786 |
| WSa-Cfb | 3               | 0.1236 | 0.1139 | 0.1370 |
| Sa-Cfb  | 12              | 0.1180 | 0.1051 | 0.1309 |
| Gr-BWk  | 29              | 0.1731 | 0.1644 | 0.1877 |
| Gr-BSk  | 9               | 0.1484 | 0.1333 | 0.1616 |
| Gr-Csa  | 69              | 0.1604 | 0.1486 | 0.1717 |
| Gr-Cfb  | 3               | 0.1265 | 0.1133 | 0.1375 |
| Gr-Dwb  | 12              | 0.1488 | 0.1227 | 0.1585 |
| Gr-Dwc  | 10              | 0.1600 | 0.1557 | 0.1642 |
| Gr-Dfc  | 4               | 0.1250 | 0.1157 | 0.1623 |
| Cr-Aw   | 11              | 0.1253 | 0.1197 | 0.1391 |
| Cr-BWh  | 3               | 0.1788 | 0.1638 | 0.1813 |
| Cr-BSk  | 5               | 0.1453 | 0.1306 | 0.1525 |
| Cr-Csa  | 6               | 0.1561 | 0.1431 | 0.1810 |
| Cr-Cwb  | 3               | 0.1398 | 0.1302 | 0.1441 |
| Cr-Cfb  | 7               | 0.1234 | 0.1001 | 0.1363 |
| Cr-Dwb  | 15              | 0.1442 | 0.1386 | 0.1492 |
| Cr-Dfc  | 7               | 0.1443 | 0.1361 | 0.1504 |
| Ba-BWh  | 15              | 0.1991 | 0.1648 | 0.2276 |
| Ba-BWk  | 59              | 0.1867 | 0.1709 | 0.2037 |
| WB-Cfb  | 3               | 0.0971 | 0.0861 | 0.1003 |
| WB-Dwb  | 4               | 0.0805 | 0.0758 | 0.0938 |

100

101

102 **Supplementary Table 5. Count of PV sites in various Köppen-Geiger climate regimes<sup>16</sup>.**

| Climate regime | Number | Description                           |
|----------------|--------|---------------------------------------|
| Aw             | 12     | Tropical, savannah                    |
| BWh            | 34     | Arid, desert, hot                     |
| BWk            | 95     | Arid, desert, cold                    |
| BSh            | 19     | Arid, steppe, hot                     |
| BSk            | 90     | Arid, steppe, cold                    |
| Cwa            | 8      | Temperate, dry winter, hot summer     |
| Cfa            | 31     | Temperate, no dry season, hot summer  |
| Cfb            | 5      | Temperate, no dry season, warm summer |
| Dwa            | 31     | Cold, dry winter, hot summer          |
| Dwb            | 11     | Cold, dry winter, warm summer         |
| Dwc            | 2      | Cold, dry winter, cold summer         |
| Dfa            | 2      | Cold, no dry season, hot summer       |
| Dfb            | 12     | Cold, no dry season, very cold winter |

103

104

105



106 **Supplementary Table 6. Sensitivity test.** Here, the criteria of the number of pixels in a domain  
 107 and the difference between the maximum and minimum area ratio of the PV panel range to the  
 108 corresponding pixel are changed to observe the sites left.

| Number of filtered sites |      | Number of pixels |     |     |     |     |     |     |
|--------------------------|------|------------------|-----|-----|-----|-----|-----|-----|
|                          |      | 20               | 15  | 12  | 10  | 9   | 8   | 7   |
| Max (AR) –               | >0.3 | 190              | 283 | 361 | 425 | 461 | 498 | 529 |
|                          | >0.4 | 189              | 282 | 360 | 422 | 456 | 489 | 513 |
| Min (AR)                 | >0.5 | 188              | 279 | 353 | 412 | 444 | 470 | 488 |

109

110

111 **Supplementary Table 7. Count of PV sites in various land-cover types.**

| Land-cover Type       | Number | Land-cover Type                           | Number |
|-----------------------|--------|-------------------------------------------|--------|
| Open Shrublands       | 39     | Croplands                                 | 61     |
| Woody Savannas        | 6      | Cropland/Natural<br>Vegetation<br>Mosaics | 3      |
| Savannas              | 14     | Barren                                    | 77     |
| Grasslands            | 144    | Water Bodies                              | 7      |
| Permanent<br>Wetlands | 1      | -                                         | -      |

112

113

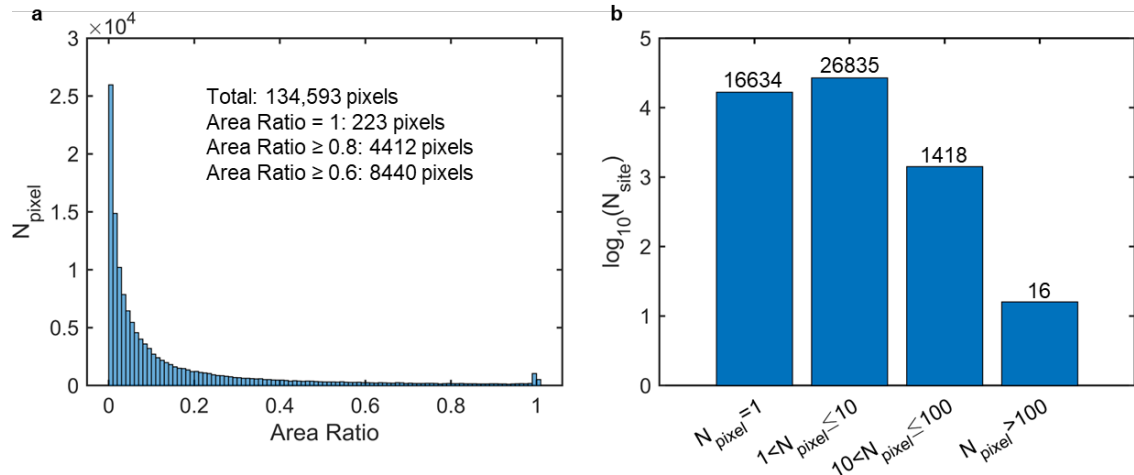

114  
 115 **Supplementary Figure 1. The analysis of grid cells containing PV facilities. a**, Histogram  
 116 illustrating the count of pixels ( $N_{\text{pixel}}$ ) with varying ratios of PV facilities' area to the  
 117 corresponding grid area. **b**, Distribution of sites ( $N_{\text{site}}$ ) based on the number of grid cells  
 118 containing PV facilities ( $N_{\text{pixel}}$ ).  
 119

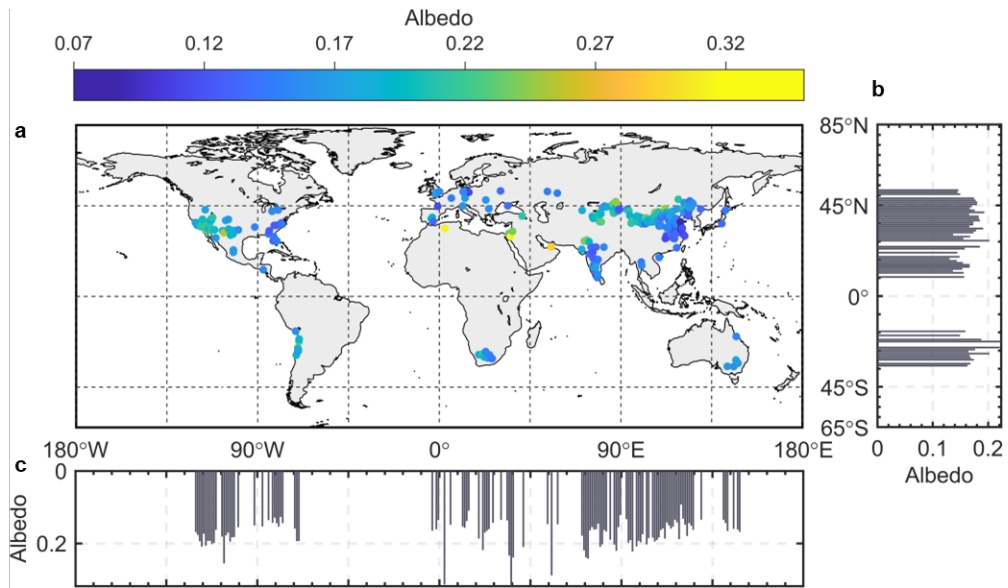

120  
 121 **Supplementary Figure 2. The background albedo of 352 specific sites due to PV**  
 122 **deployment. a**, Spatial distribution of PV sites' albedo change. **b** and **c**, The latitude (**b**) and  
 123 longitude (**c**) pattern of mean albedo change per degree.

124  
 125

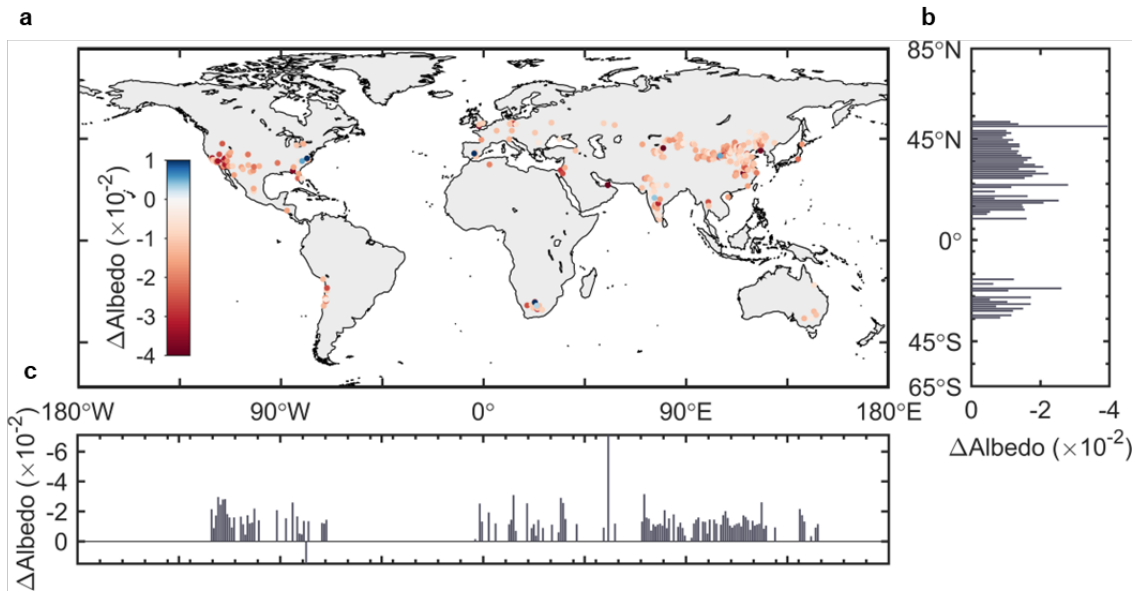

126  
 127 **Supplementary Figure 3. The absolute albedo change ( $\times 10^{-2}$ ) of 352 specific sites due to**  
 128 **PV deployment. a**, Spatial distribution of PV sites' absolute albedo change. **b** and **c**, The  
 129 latitude (**b**) and longitude (**c**) patterns of mean absolute albedo change per degree.  
 130

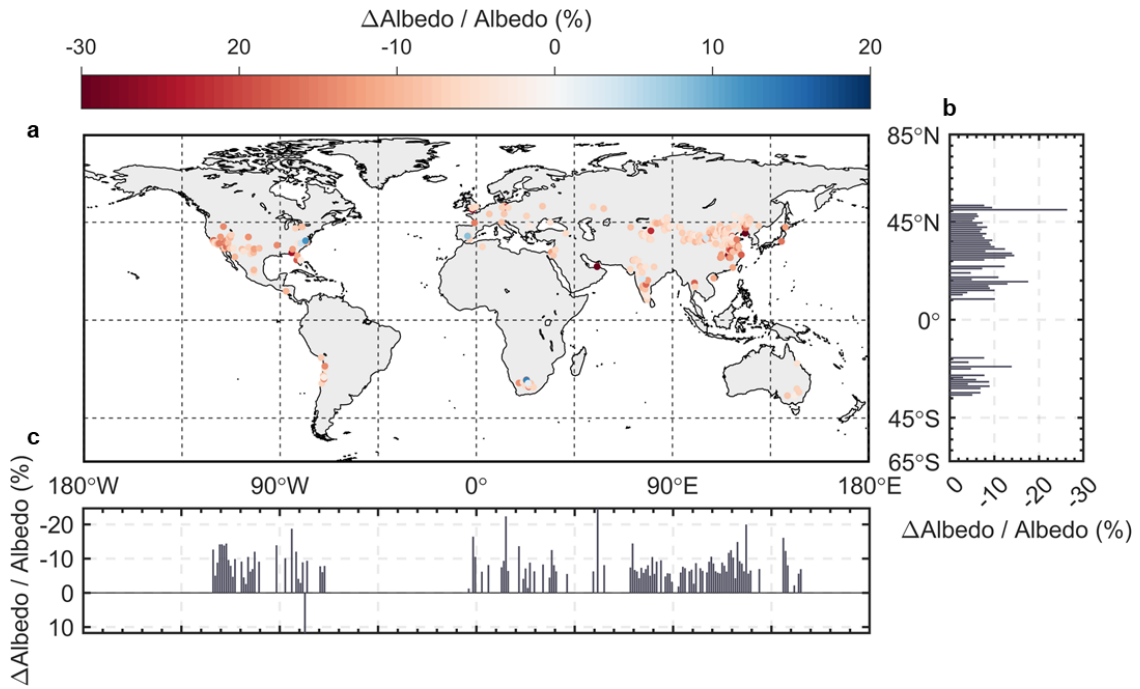

131  
 132 **Supplementary Figure 4. The relative albedo change (%) of 352 specific sites due to PV**  
 133 **deployment. a**, Spatial distribution of PV sites' relative albedo change. **b** and **c**, The latitude  
 134 **(b)** and longitude **(c)** patterns of mean relative albedo change per degree.  
 135

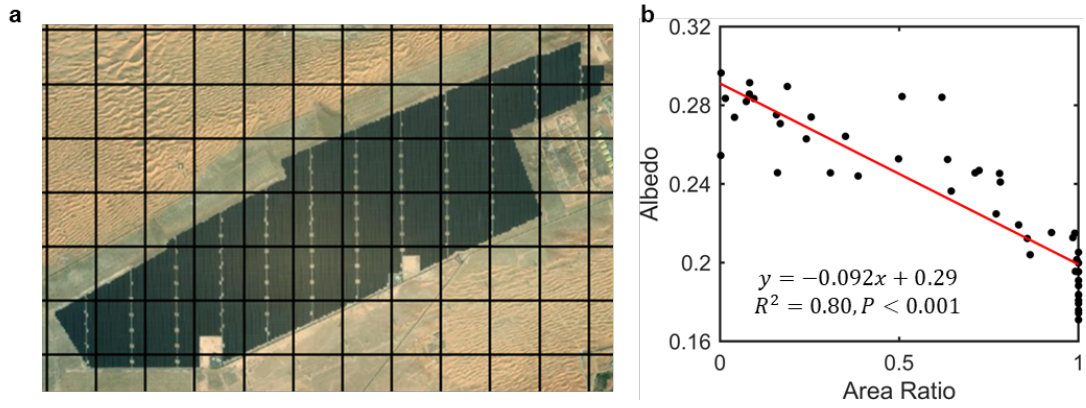

136  
 137 **Supplementary Figure 5. Noor Abu Dhabi Solar Power Plant (55.44°E, 22.54°N), where**  
 138 **maximum albedo reduction happens.** In **a**, the satellite imagery is extracted from ERSI World  
 139 Imagery (2022-1-12) in ArcMap 10.8. The grid cells have a resolution of 500 m. **b**, The  
 140 correlation between area ratio and albedo. The solid red line denotes the fitting line.  
 141

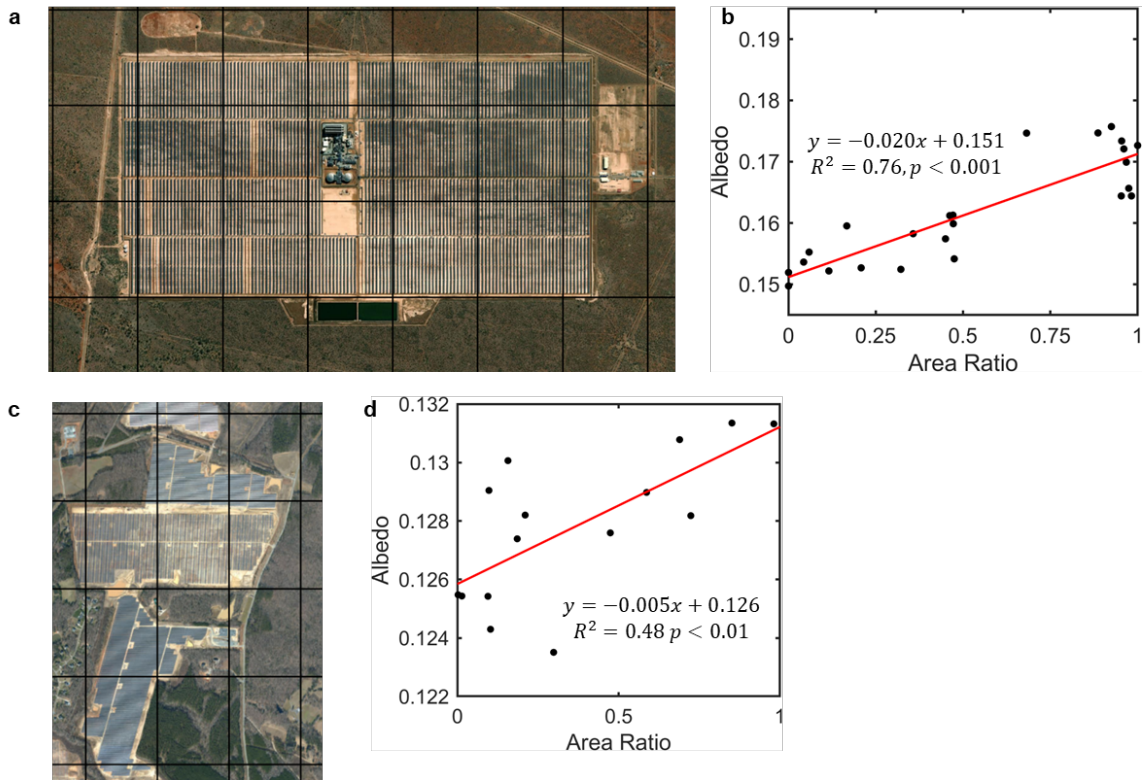

142  
 143 **Supplementary Figure 6. Two sites with positive albedo change.** In **a** (23.03°E, 27.61°S)  
 144 and **c** (80.50°W, 35.30°N), The satellite imageries are extracted from ERSI World Imagery  
 145 (2022-1-12) in ArcMap 10.8. The grid cells have a resolution of 500m. **b** and **d** show the linear  
 146 regression and corresponding parameters. The solid red line denotes the fitting line.  
 147



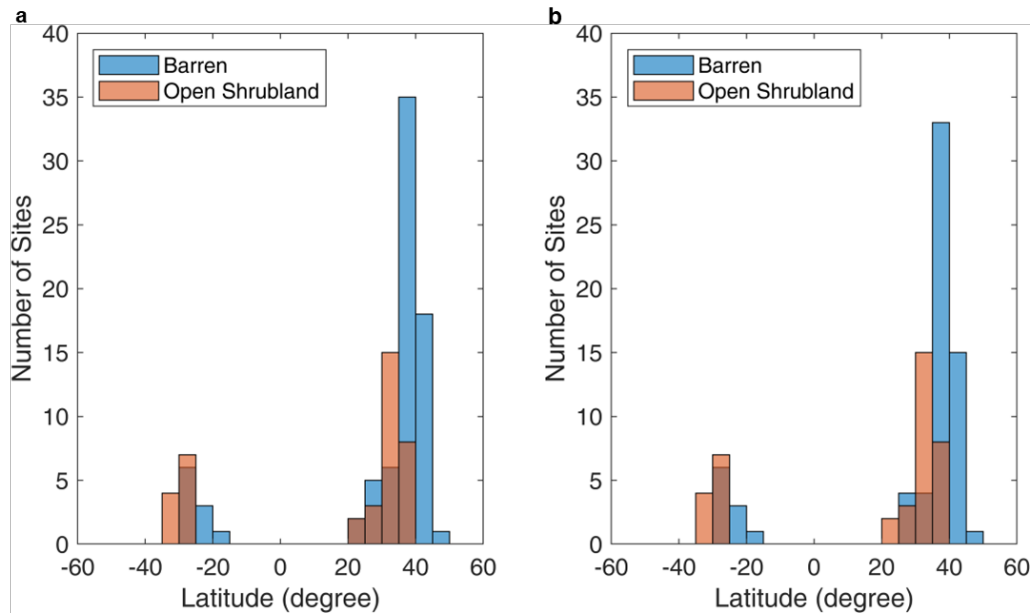

148

149 **Supplementary Figure 7. The latitude pattern comparison of PV sites over open**

150 **shrublands and barren. a**, The latitude pattern of all PV sites over open shrublands (n = 39)

151 and barren (n = 77). **b**, The latitude pattern of sites over open shrublands (n = 39) and filtered

152 sites over barren (n = 67). The barren sites included in **b** have been selectively filtered to match

153 the background albedo range of the open shrublands, ensuring a consistent comparison of

154 background albedo between the two land cover types. Most of the PV sites located over barren

155 (38.99°N; median) are positioned at higher latitudes compared to those over open shrublands

156 (34.06°N; median) in the Northern Hemisphere. This implies that PV arrays at these barren

157 sites require greater spacing to mitigate the shading effects on the panel generation.

158

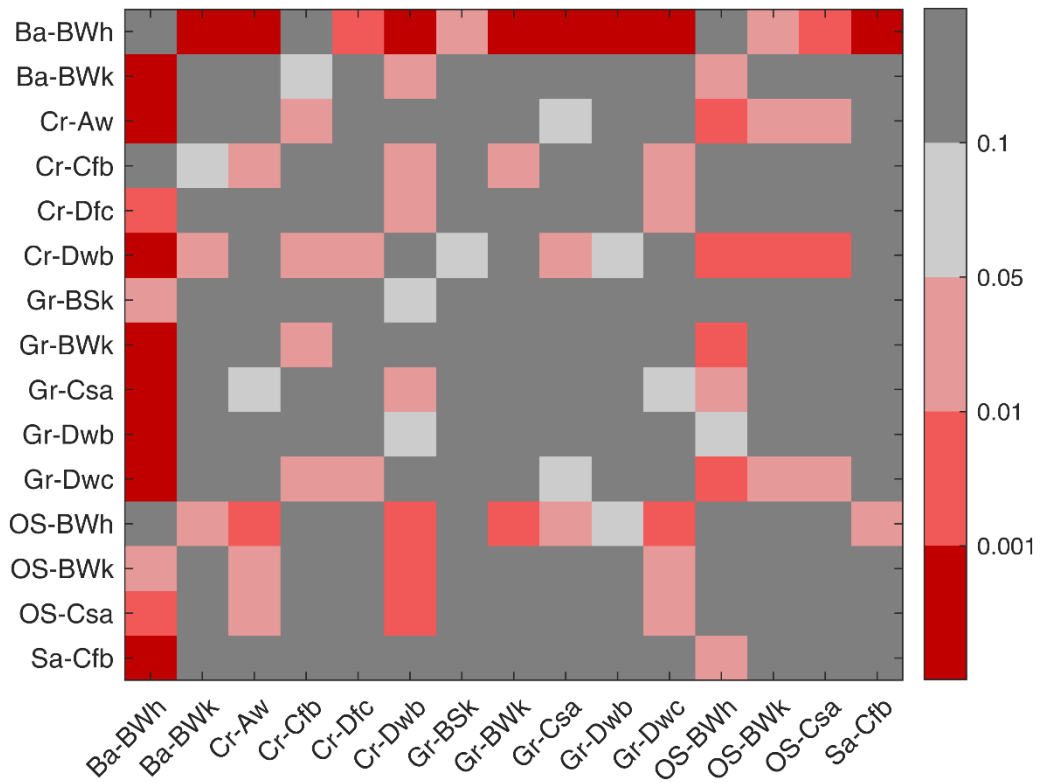

159  
160  
161  
162  
163  
164  
165

**Supplementary Figure 8. The significant-difference-level of albedo change between sites in climate regimes of corresponding land-cover types.** Wilcoxon rank sum test is used (\*  $P < 0.05$ , \*\*  $P < 0.01$ , \*\*\*  $P < 0.001$ ). Only categories with a site number greater than 7 are shown here. For further clarification on the abbreviations used for the climate regimes, please refer to Supplementary Table 5.

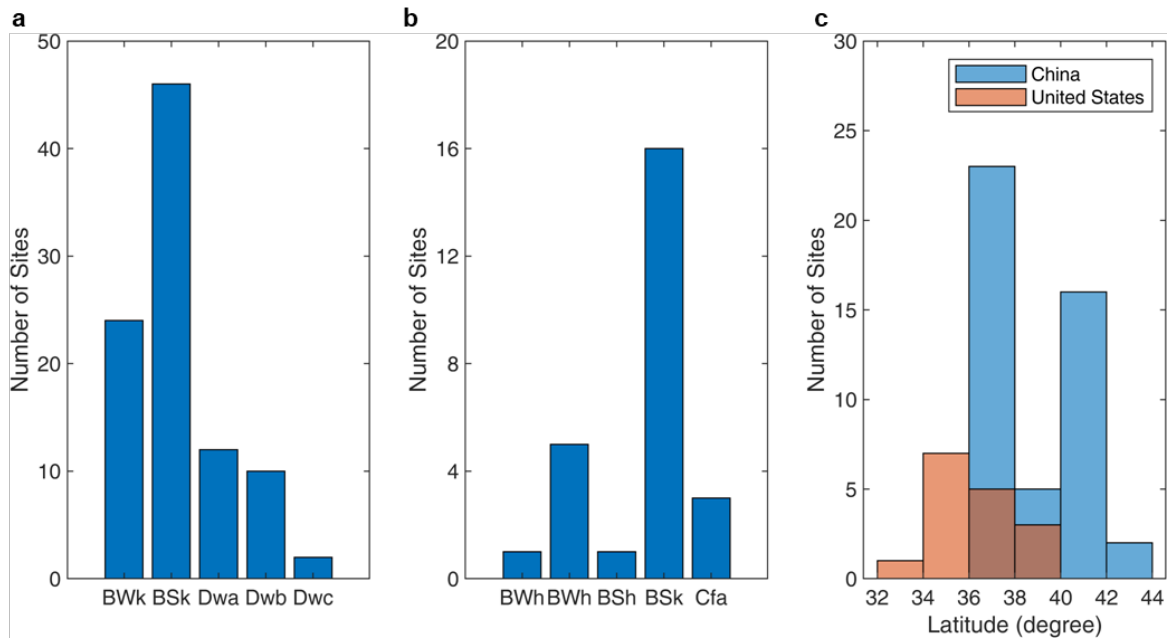

166

167 **Supplementary Figure 9. The comparison of albedo change over grassland PV sites**  
 168 **between China and the United States. a,** The counts of grassland PV sites under different  
 169 climate regimes in China. **b,** The counts of grassland PV sites under different climate regimes  
 170 in the United States. **c,** The latitude distributions of grassland PV sites under BSk regime in  
 171 China and the United States, respectively.

172

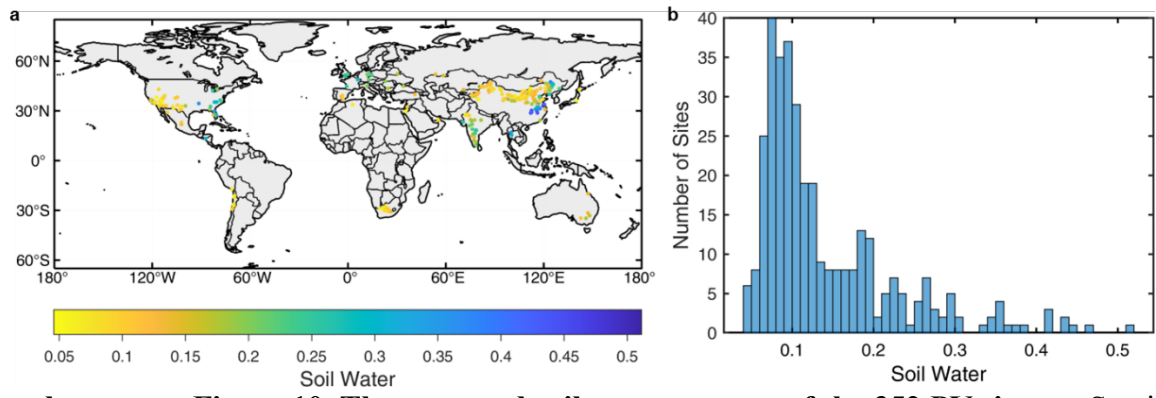

173  
 174 **Supplementary Figure 10. The averaged soil water content of the 352 PV sites. a,** Spatial  
 175 pattern of sites' averaged soil water content. **b,** The histogram of corresponding mean soil water  
 176 content in the 352 PV sites.  
 177

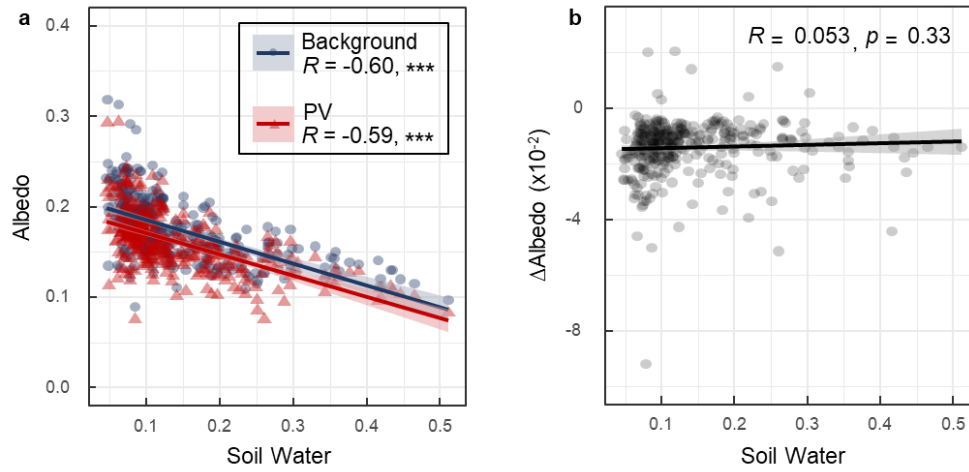

178  
 179 **Supplementary Figure 11. The influence of soil water content on background albedo and**  
 180 **albedo change. a,** The correlation between site-level mean soil water and the albedo before  
 181 (blue dots) and after (red dots) PV deployment. **b,** The relationship between soil water and  
 182 albedo change.  
 183

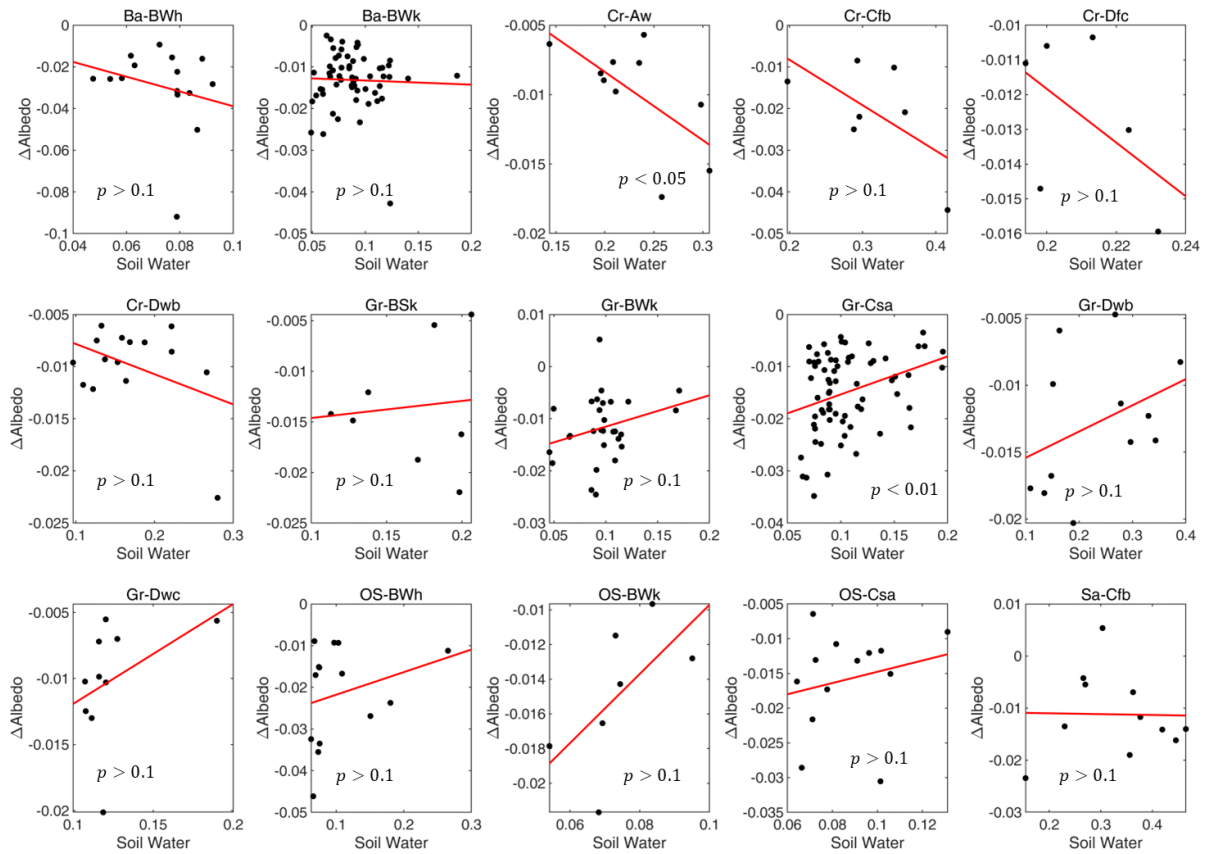

184  
 185  
 186  
 187

**Supplementary Figure 12. The influence of soil water content on albedo change specific to different climate regimes of corresponding land-cover types.**

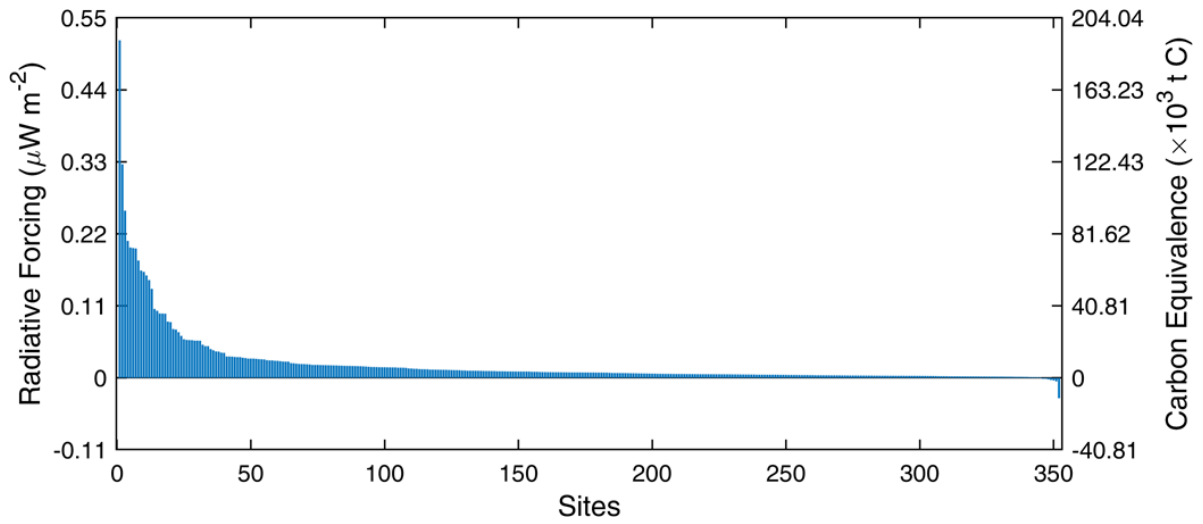

188  
 189  
 190  
 191  
 192

**Supplementary Figure 13. The radiative forcing and carbon equivalence of different sites (352).** Sites have been rearranged in descending order of radiative forcing values, from the highest to the lowest.

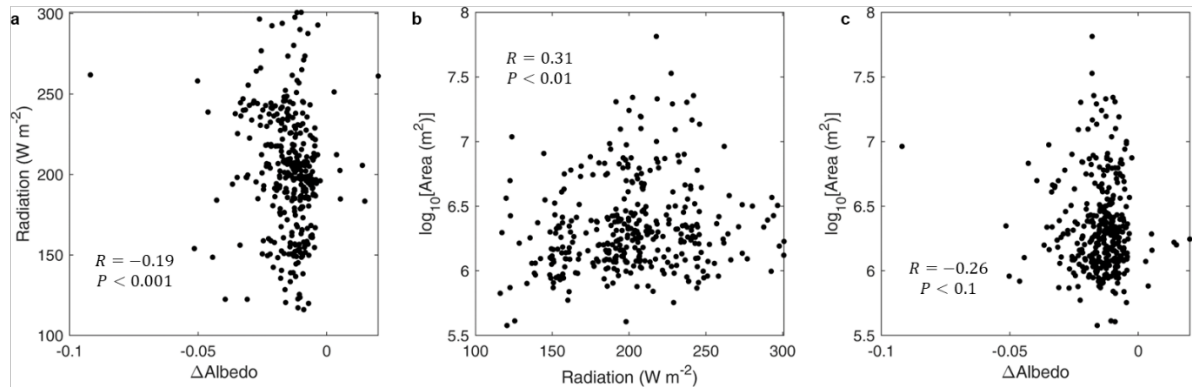

193

194

195

196

197

198

**Supplementary Figure 14. The relationships between any two of the three factors: the area covered by PV panels, the albedo change caused by PV deployment, and the total downward shortwave radiation in the region. Spearman correlation analysis is used here. The three variables potentially interact with each other in pairs.**



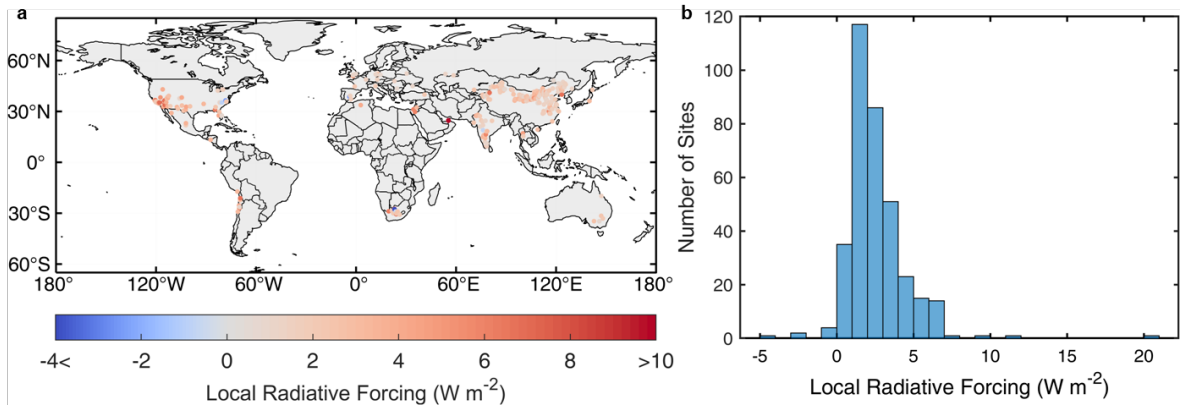

199

200

201

202

**Supplementary Figure 15. The local radiative forcing (RF) of the 352 PV sites. a,** Spatial pattern of sites' local RF. **b,** The histogram of corresponding local RF in the 352 PV sites.

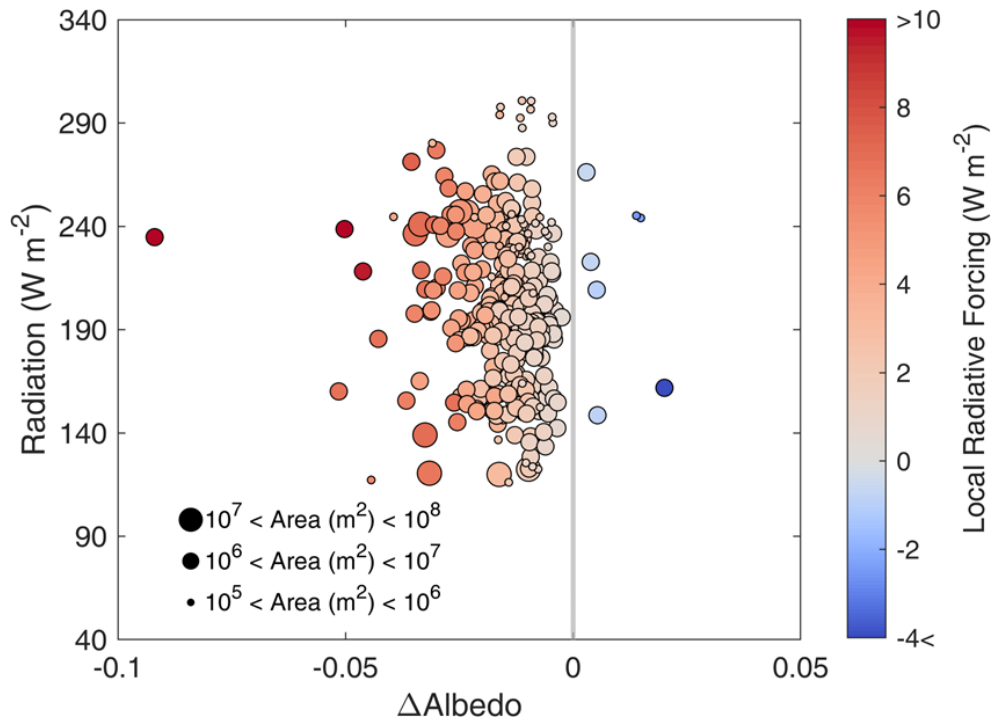

203

204 **Supplementary Figure 16. Drivers influencing local radiative forcing (local RF).** The grey  
 205 line shows the zero value of albedo change. The greater the deviation from the zero line, the  
 206 more significant the change in shortwave forcing, highlighting the dominant role of albedo  
 207 change compared to radiation.

208

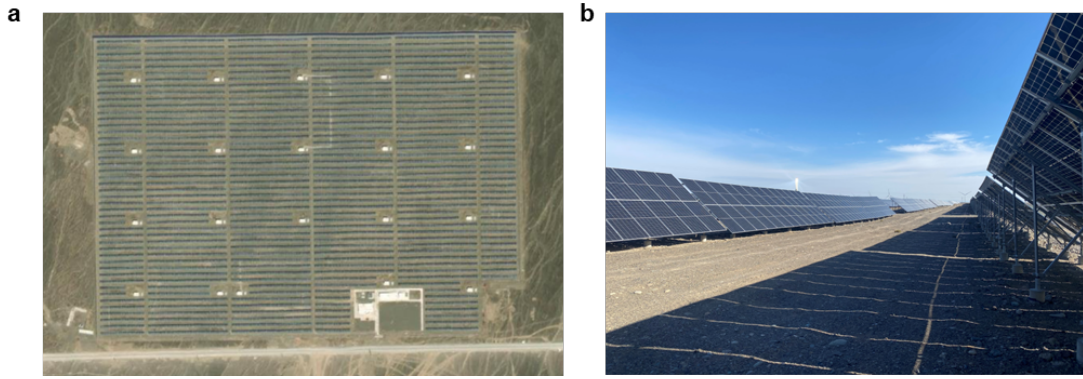

209  
210  
211  
212  
213  
214

**Supplementary Figure 17. A solar power plant (94.93°E, 43.60°N) in Hami City, Xinjiang, China. a,** The satellite imagery extracted from ERSI World Imagery (2022-1-12) in ArcMap 10.8. **b,** A photo taken during an on-site investigation. We can find that there are large gaps between solar panel arrays in the solar farm, which is not obvious in the satellite imagery.

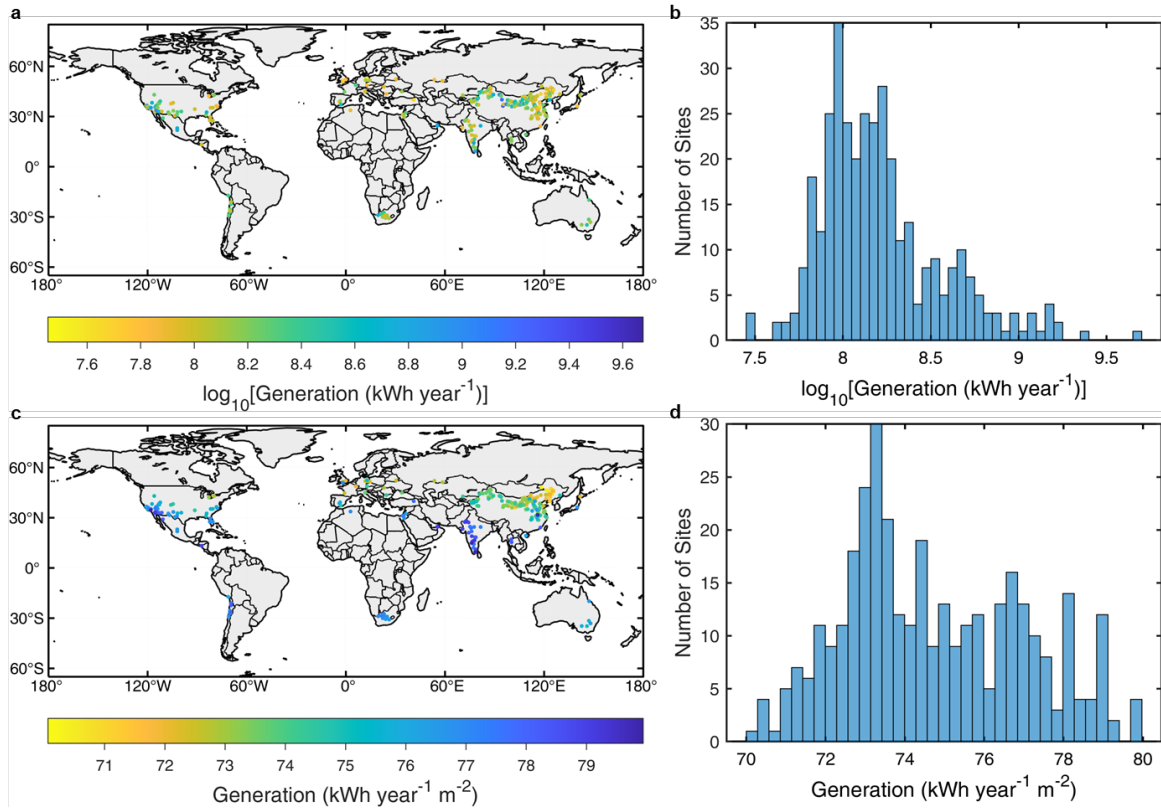

215  
 216  
 217  
 218  
 219

**Supplementary Figure 18. The yearly total generation and generation per unit of each PV site. a and b show the spatial pattern and histogram of the total generation per PV site, while c and d show the generation per unit of each PV site.**

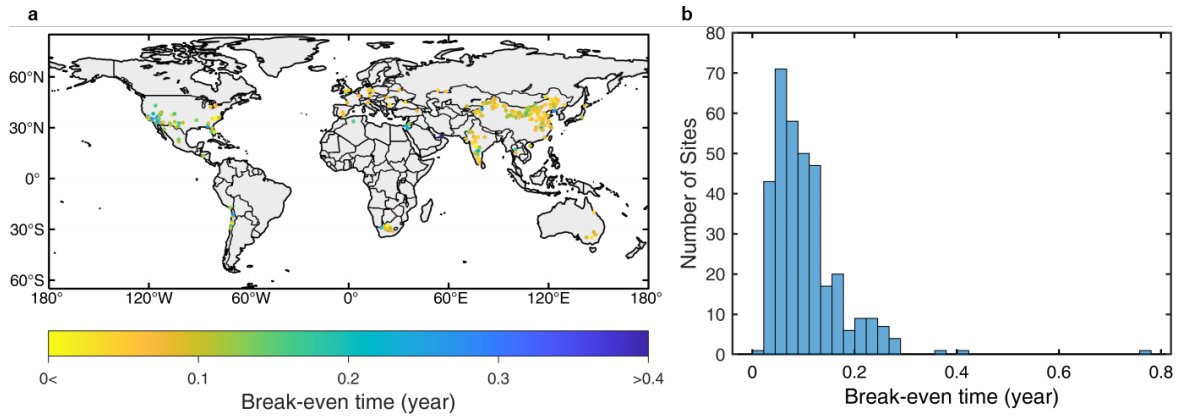

220  
 221  
 222  
 223  
 224

**Supplementary Figure 19. The break-even time of each PV site. a,** Spatial pattern of sites' break-even time. **b,** The frequency distribution histogram of PV sites' break-even time. Only positive values are shown.

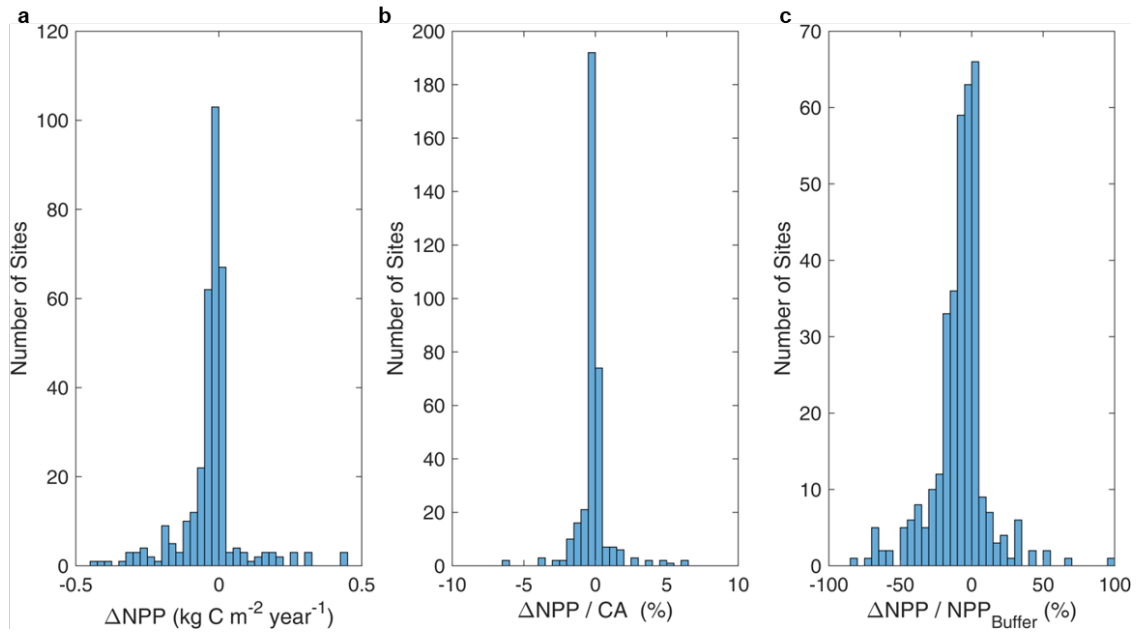

225

226

**Supplementary Figure 20. The influence of PV installation on Net Primary Productivity**

227

**(NPP). a,** The NPP difference between the PV site and the corresponding buffer zone. **b,** The

228

comparison between the changed NPP and carbon avoidance (CA; Supplementary Methods)

229

by PV generation. **c,** The ratio of NPP change value to the buffer zone's NPP.

230

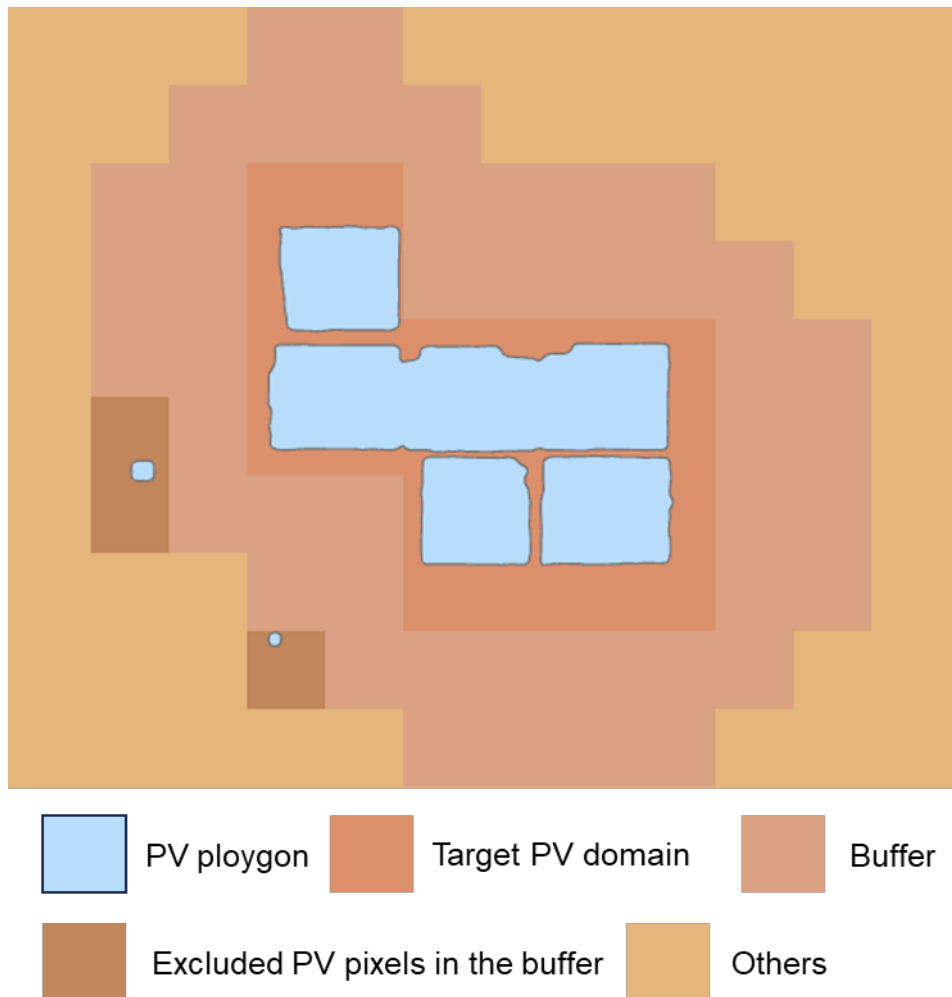

231

232

233

234

235

236

237

**Supplementary Figure 21. The diagram of creating a buffer near a target PV domain (site).** To create a buffer zone with a width of 2 pixels around a selected PV connected region, a dilation operation is used to enlarge the target PV region by adding two pixels around its edges. Any other PV regions within the buffer zone, apart from the target PV domain, are excluded.

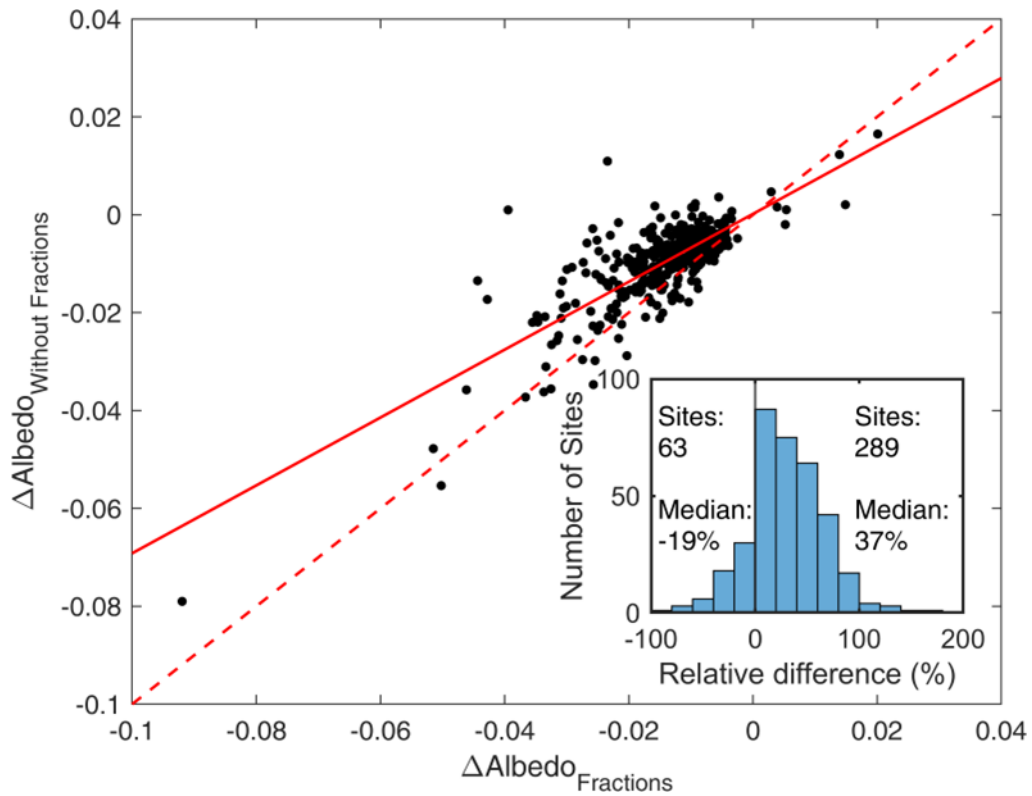

238

239 **Supplementary Figure 22. The comparison of absolute albedo change ( $\Delta\text{Albedo}$ ) over 352**  
 240 **selected PV sites between considering the PV grid fractions and without considering the**  
 241 **fractions.** The red solid line represents the line of equality ( $x=y$ ), while the dashed line  
 242 indicates the fitting line. The inset details the ratio of differences in albedo change with and  
 243 without PV grid fractions to albedo change with PV grid fractions. A relative difference greater  
 244 than zero indicates that the albedo change is greater when considering PV grid fractions.  
 245 Additionally, the inset captions provide the count of sites with relative differences both greater  
 246 and less than zero, along with their respective median relative difference values.

247

248



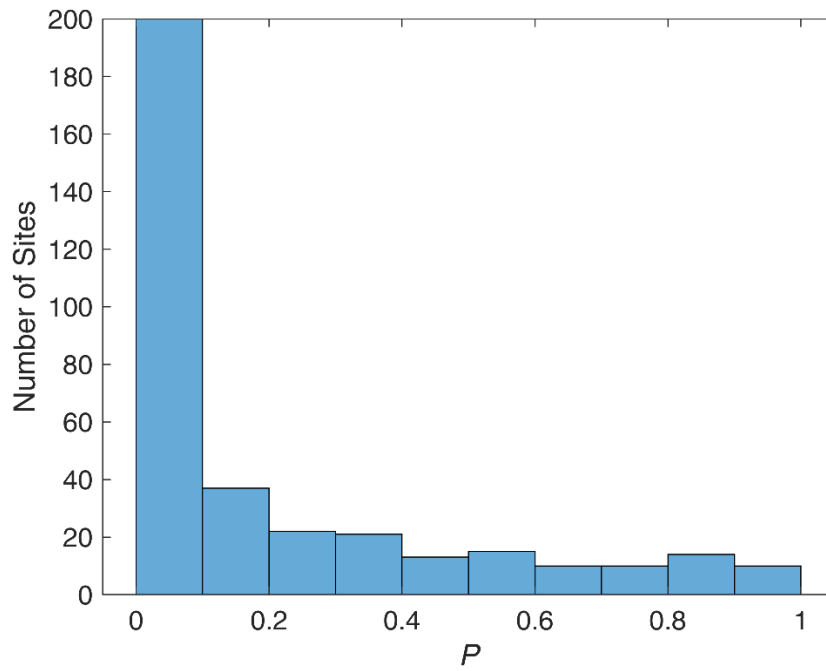

249

250 **Supplementary Figure 23. The histogram of  $P$  values when utilizing our linear**  
251 **parameterization method for calculating NPP changes over 352 sites. Nearly half of the**  
252 **sites have  $P$  values greater than 0.1.**

253

254 **Supplementary References**

- 255 1. Stern, R., et al., 2023. Photovoltaic fields largely outperform afforestation efficiency in  
256 global climate change mitigation strategies. *Proceedings of the National Academy of*  
257 *Sciences Nexus*. **2**, pgad352.
- 258 2. Li, Y., et al., 2018. Climate model shows large-scale wind and solar farms in the Sahara  
259 increase rain and vegetation. *Science*. **361**, 1019-1022.
- 260 3. Lu, Z., et al., 2021. Impacts of Large-Scale Sahara Solar Farms on Global Climate and  
261 Vegetation Cover. *Geophysical Research Letters*. **48**, e2020GL090789.
- 262 4. Millstein, D., et al., 2011. Regional climate consequences of large-scale cool roof and  
263 photovoltaic array deployment. *Environmental Research Letters*. **6**, 034001
- 264 5. Chang, R., et al., 2020. Simulated local climatic impacts of large-scale photovoltaics over  
265 the barren area of Qinghai, China. *Renewable Energy*. **145**, 478-489.
- 266 6. Chang, R., et al., 2022. A coupled WRF-PV mesoscale model simulating the near-surface  
267 climate of utility-scale photovoltaic plants. *Solar Energy*, 245, 278–289.
- 268 7. Yang, L., et al., 2017. Study on the local climatic effects of large photovoltaic solar farms  
269 in desert areas. *Solar Energy*. **144**, 244-253.
- 270 8. Chang, R., et al., 2018. Observed surface radiation and temperature impacts from the large-  
271 scale deployment of photovoltaics in the barren area of Gonghe, China. *Renewable Energy*.  
272 **118**, 131-137.
- 273 9. Broadbent, A. M., et al., 2019. The Observed Effects of Utility-Scale Photovoltaics on  
274 Near-Surface Air Temperature and Energy Balance. *Journal of Applied Meteorology and*  
275 *Climatology*. **58**, 989-1006.
- 276 10. Li, P., et al., 2022. Physical analysis of the environmental impacts of fishery  
277 complementary photovoltaic power plant. *Environmental Science and Pollution Research*.  
278 **29**, 46108-46117.
- 279 11. Li, Z., et al., 2022. A comparative study on the surface radiation characteristics of  
280 photovoltaic power plant in the Gobi desert. *Renewable Energy*. **182**, 764-771.
- 281 12. Ying, J., et al., 2022. The characteristics and parameterizations of the surface albedo of a  
282 utility-scale photovoltaic plant in the Gobi Desert. *Theoretical and Applied Climatology*.  
283 **151**, 1469-1481.
- 284 13. Hua, Y., et al., 2022. The Influences of the Desert Photovoltaic Power Station on Local  
285 Climate and Environment: A Case Study in Dunhuang Photovoltaic Industrial Park,  
286 Dunhuang City, China in 2019. *Atmosphere*. **13**, 1235.

- 287 14. Zhang, X., et al, 2020. Assessing the Effects of Photovoltaic Powerplants on Surface  
288 Temperature Using Remote Sensing Techniques. *Remote Sensing*. **12**, 1825.
- 289 15. Xu, Z., et al., 2024. A global assessment of the effects of solar farms on albedo, vegetation,  
290 and land surface temperature using remote sensing. *Solar Energy*. **268**, 112198.
- 291 16. Beck, H., et al, 2018. Present and future Köppen-Geiger climate classification maps at 1-  
292 km resolution. *Scientific Data*. **5**, 180214.
- 293
